# Supplementary material for: Hepatitis C risk score as a tool to identify individuals with HCV infection: a demonstration and cross-sectional epidemiological study in Egypt
Source: PubMed Central journal article supplement — BMJ Open. 2024 Jul 1;14(6):e085506. doi: 10.1136/bmjopen-2024-085506 (PMC11340217; doi:10.1136/bmjopen-2024-085506), 2024-07-01
Supplement: bmjopen-2024-085506.draft_revisions.pdf [file bmjopen-2024-085506.draft_revisions.pdf]

# BMJ Open

BMJ Open is committed to open peer review. As part of this commitment we make the peer review history of every article we publish publicly available.

When an article is published we post the peer reviewers' comments and the authors' responses online. We also post the versions of the paper that were used during peer review. These are the versions that the peer review comments apply to.

The versions of the paper that follow are the versions that were submitted during the peer review process. They are not the versions of record or the final published versions. They should not be cited or distributed as the published version of this manuscript.

BMJ Open is an open access journal and the full, final, typeset and author-corrected version of record of the manuscript is available on our site with no access controls, subscription charges or pay-per-view fees (<http://bmjopen.bmj.com>).

If you have any questions on BMJ Open's open peer review process please email [info.bmjopen@bmj.com](mailto:info.bmjopen@bmj.com)

# BMJ Open

## Hepatitis C risk score as a tool to identify infected individuals: A demonstration study in Egypt

|                               |                                                                                                                                                                                                                                                                                                                                                                                                                                                                                                                                                                                                                                                                                                                                                                                                                                                                                                                                        |
|-------------------------------|----------------------------------------------------------------------------------------------------------------------------------------------------------------------------------------------------------------------------------------------------------------------------------------------------------------------------------------------------------------------------------------------------------------------------------------------------------------------------------------------------------------------------------------------------------------------------------------------------------------------------------------------------------------------------------------------------------------------------------------------------------------------------------------------------------------------------------------------------------------------------------------------------------------------------------------|
| Journal:                      | <i>BMJ Open</i>                                                                                                                                                                                                                                                                                                                                                                                                                                                                                                                                                                                                                                                                                                                                                                                                                                                                                                                        |
| Manuscript ID                 | bmjopen-2024-085506                                                                                                                                                                                                                                                                                                                                                                                                                                                                                                                                                                                                                                                                                                                                                                                                                                                                                                                    |
| Article Type:                 | Original research                                                                                                                                                                                                                                                                                                                                                                                                                                                                                                                                                                                                                                                                                                                                                                                                                                                                                                                      |
| Date Submitted by the Author: | 20-Feb-2024                                                                                                                                                                                                                                                                                                                                                                                                                                                                                                                                                                                                                                                                                                                                                                                                                                                                                                                            |
| Complete List of Authors:     | El-Khoury, Rayane; Weill Cornell Medicine - Qatar, Infectious Disease Epidemiology Group<br>Chemaitelly, Hiam; Weill Cornell Medicine - Qatar, Infectious Disease Epidemiology Group; Weill Cornell Medicine - Qatar, World Health Organization Collaborating Centre for Disease Epidemiology Analytics on HIV/AIDS, Sexually Transmitted Infections, and Viral Hepatitis<br>Alaama, Ahmed S.; World Health Organisation Regional Office for the Eastern Mediterranean, Department of Communicable Diseases<br>Hermez, Joumana G.; World Health Organisation Regional Office for the Eastern Mediterranean, Department of Communicable Diseases<br>Nagelkerke, Nico; Weill Cornell Medicine - Qatar, Infectious Disease Epidemiology Group<br>Abu-Raddad, Laith; Weill Cornell Medicine - Qatar, Infectious Disease Epidemiology Group, Weill Cornell Medicine-Qatar; Weill Cornell Medicine, Department of Population Health Sciences |
| Keywords:                     | EPIDEMIOLOGY, Risk Factors, Public health < INFECTIOUS DISEASES                                                                                                                                                                                                                                                                                                                                                                                                                                                                                                                                                                                                                                                                                                                                                                                                                                                                        |
|                               |                                                                                                                                                                                                                                                                                                                                                                                                                                                                                                                                                                                                                                                                                                                                                                                                                                                                                                                                        |

SCHOLARONE™  
Manuscripts

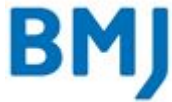

I, the Submitting Author has the right to grant and does grant on behalf of all authors of the Work (as defined in the below author licence), an exclusive licence and/or a non-exclusive licence for contributions from authors who are: i) UK Crown employees; ii) where BMJ has agreed a CC-BY licence shall apply, and/or iii) in accordance with the terms applicable for US Federal Government officers or employees acting as part of their official duties; on a worldwide, perpetual, irrevocable, royalty-free basis to BMJ Publishing Group Ltd ("BMJ") its licensees and where the relevant Journal is co-owned by BMJ to the co-owners of the Journal, to publish the Work in this journal and any other BMJ products and to exploit all rights, as set out in our [licence](#).

The Submitting Author accepts and understands that any supply made under these terms is made by BMJ to the Submitting Author unless you are acting as an employee on behalf of your employer or a postgraduate student of an affiliated institution which is paying any applicable article publishing charge ("APC") for Open Access articles. Where the Submitting Author wishes to make the Work available on an Open Access basis (and intends to pay the relevant APC), the terms of reuse of such Open Access shall be governed by a Creative Commons licence – details of these licences and which [Creative Commons](#) licence will apply to this Work are set out in our licence referred to above.

Other than as permitted in any relevant BMJ Author's Self Archiving Policies, I confirm this Work has not been accepted for publication elsewhere, is not being considered for publication elsewhere and does not duplicate material already published. I confirm all authors consent to publication of this Work and authorise the granting of this licence.

## ORIGINAL RESEARCH

**Hepatitis C risk score as a tool to identify infected individuals: A demonstration study in Egypt**

Rayane El-Khoury<sup>1,2</sup>, Hiam Chemaitelly<sup>1,2,3</sup>, Ahmed S. Alaama<sup>4</sup>, Joumana G. Hermez<sup>4</sup>, and Nico Nagelkerke<sup>1</sup>, Laith J. Abu-Raddad<sup>1,2,3,5,6\*</sup>

<sup>1</sup>*Infectious Disease Epidemiology Group, Weill Cornell Medicine-Qatar, Cornell University, Qatar Foundation - Education City, Doha, Qatar*

<sup>2</sup>*World Health Organization Collaborating Centre for Disease Epidemiology Analytics on HIV/AIDS, Sexually Transmitted Infections, and Viral Hepatitis, Weill Cornell Medicine-Qatar, Cornell University, Qatar Foundation – Education City, Doha, Qatar*

<sup>3</sup>*Department of Population Health Sciences, Weill Cornell Medicine, Cornell University, New York, New York, USA*

<sup>4</sup>*Department of Communicable Diseases, HIV/Hepatitis/STIs Unit, World Health Organization Regional Office for the Eastern Mediterranean, Cairo, Egypt*

<sup>5</sup>*Department of Public Health, College of Health Sciences, Member of QU Health, Qatar University, Doha, Qatar*

<sup>6</sup>*College of Health and Life Sciences, Hamad bin Khalifa University, Doha, Qatar*

**Word count:** Abstract: 276 words, Main text: 3,380 words.

**Number of tables:** 3.

**Number of figures:** 3.

**Running head:** Hepatitis C virus risk score in Egypt.

**Funding:** The Qatar National Research Fund (NPRP 12S-0216-190094).

**\*Correspondence to:** Professor Laith J. Abu-Raddad, Infectious Disease Epidemiology Group, World Health Organization Collaborating Centre for Disease Epidemiology Analytics on HIV/AIDS, Sexually Transmitted Infections, and Viral Hepatitis, Weill Cornell Medicine - Qatar, Qatar Foundation - Education City, P.O. Box 24144, Doha, Qatar. Telephone: +(974) 4492-8321. Fax: +(974) 4492-8333. E-mail: [lja2002@qatar-med.cornell.edu](mailto:lja2002@qatar-med.cornell.edu).

## ABSTRACT

**Objectives:** Hepatitis C virus (HCV) infection poses a global health challenge. By the end of 2021, the World Health Organization estimated that less than a quarter of global HCV infections had been diagnosed. There is a need for a public health tool that can facilitate the identification of infected individuals and link them to testing and treatment, and that can be customized for each country.

**Methods:** We derived and validated a risk score to identify infected individuals in Egypt and demonstrated its utility. Utilizing data from the 2008 and 2014 Egypt Demographic and Health Surveys, two risk scores were constructed through multivariable logistic regression analysis. A range of diagnostic metrics was then calculated to evaluate the performance of these scores.

**Results:** The 2008 and 2014 risk scores exhibited similar dependencies on sex, age, and type of place of residence. Both risk scores demonstrated high and similar areas under the curve of 0.77 (95% CI: 0.76-0.78) and 0.78 (95% CI: 0.77-0.80), respectively. For the 2008 Risk Score, sensitivity was 73.7% (95% CI: 71.5-75.9%), specificity was 68.5% (95% CI: 67.5-69.4%), positive predictive value (PPV) was 27.8% (95% CI: 26.4-29.2%), and negative predictive value (NPV) was 94.1% (95% CI: 93.5-94.6%). For the 2014 Risk Score, sensitivity was 64.0% (95% CI: 61.5-66.6%), specificity was 78.2% (95% CI: 77.5-78.9%), PPV was 22.2% (95% CI: 20.9-23.5%), and NPV was 95.7% (95% CI: 95.4-96.1%). Each score was validated by applying it to a different survey database than the one used to derive it.

**Conclusions:** Implementation of HCV risk scores is an effective strategy to identify carriers of HCV infection and to link them to testing and treatment at low cost to national programs.

**Keywords:** Hepatitis C virus, viral hepatitis, risk score, Egypt, Demographic Health Survey.

### **What is already known on this topic**

The World Health Organization has set a global target to eliminate HCV infection as a public health problem by 2030. The Middle East and North Africa (MENA) region is the most affected by HCV infection. While mass testing and treatment programs may be relevant in countries with high prevalence, other countries exhibit relatively low HCV prevalence, rendering such programs less cost-effective. There is a need for a public health tool that can aid in identifying potentially infected individuals to link them to testing and treatment.

### **What this study adds**

This study demonstrated the effectiveness of a risk score as a non-invasive public health tool comprising a few simple questions to identify carriers of HCV infection and link them to testing and treatment. Specifically demonstrated in Egypt, the tool exhibited good diagnostic accuracy, as indicated by various diagnostic performance metrics.

### **How this study might affect research, practice or policy**

A single national survey for HCV infection can be sufficient to develop an effective risk score for HCV infection, which can become an integral component of the national strategy to eliminate this infection in a given country.

## INTRODUCTION

Hepatitis C virus (HCV) infection is a global public health challenge[1, 2] and a major cause of morbidity and mortality, resulting in liver cancer, fibrosis, and cirrhosis[3]. By end of 2021, the World Health Organization (WHO) estimated that 58 million people were infected with HCV, but only 15 million of them were diagnosed and only 9 million received treatment[4]. Direct-acting antivirals (DAA) offer highly effective treatment to cure this infection and to prevent progression toward severe forms of liver disease[5], as well as an opportunity to reduce HCV transmission through treatment as prevention[6, 7]. Accordingly, the WHO has set a global target to eliminate HCV infection as a public health problem by 2030[2, 8].

While DAAs are becoming accessible globally, it has been challenging to identify carriers of this infection so as to treat them, especially in the Middle East and North Africa (MENA), the region most affected by HCV infection and where most infected persons remain undiagnosed[9, 10].

Limited resources have made it challenging for viral hepatitis programs to find low-cost and cost-effective approaches to identify infected persons. While mass testing and treatment programs may be relevant in high prevalence countries, other countries have relatively low HCV prevalence making such programs less cost-effective[10-16]. While low-cost point-of-care tests (POCs) have been beneficial in some countries, such as Egypt[17], they remain relatively expensive for countries like Pakistan, which bear a substantial share of the global burden[18-20]. There is a need for a public health tool that can assist in identifying potentially infected persons so as to link them to testing and treatment.

One such tool is the use of risk scores to identify potentially infected individuals. A risk score comprises a small set of simple questions that can be used to assess the likelihood that an individual has a specific health condition[21-24], in this case, HCV infection. Such risk scores

1  
2  
3 have proven influential as public health tools for a range of health conditions, such as  
4  
5 diabetes[21-24].  
6  
7

8 In this study, we demonstrate the application of this public health tool for HCV infection in  
9  
10 Egypt, aiming to illustrate the public health value and practical utility of developing HCV risk  
11  
12 scores in various countries. The risk score derived here is not intended for universal application  
13  
14 across diverse settings; it is specifically designed for Egypt. However, the concept and analytical  
15  
16 approach can be adapted to other countries by considering the local HCV epidemiology to  
17  
18 determine the relevant factors and their respective weights for inclusion in a score tailored to  
19  
20 each specific context.  
21  
22  
23

## 24 **METHODS**

### 25 *Egypt Demographic and Health Surveys*

26  
27  
28 The Egypt Demographic and Health Survey (EDHS) is a national survey that collected data  
29  
30 pertaining to the health and demographics of a nationally representative sample of the resident  
31  
32 population of Egypt, including HCV infection[25, 26]. The EDHS that included HCV  
33  
34 biomarkers was conducted in 2008 and 2014 and used rigorous sampling methods[27]. Details  
35  
36 on study design, data collection, and laboratory methods can be found in El-Zanaty et al.[25, 26].  
37  
38 HCV antibody testing was done using a third generation enzyme-linked immunosorbent assay  
39  
40 (ELISA), the Enzyme Immunoassay Adlatis EIAgen HCV Ab test (Adaltis Inc., Montreal,  
41  
42 Canada)[25, 26]. All samples that were positive in the ELISA assay and 5% of the negative  
43  
44 samples were then retested using a more specific assay, the chemiluminescent microplate  
45  
46 immunoassay (CMIA ARCHITECT plus i1000SR, Abbott Diagnostic, USA)[25, 26]. If a  
47  
48 sample was positive in both the ELISA and the CMIA testing, it was also tested for current  
49  
50  
51  
52  
53  
54  
55  
56  
57  
58  
59  
60



1  
2  
3 active infection, using real-time, reverse-transcription polymerase chain reaction (RT-qPCR)  
4 testing to detect HCV ribonucleic acid (RNA)[25, 26]. Samples were further retested for internal  
5 and external quality assurance[25, 26]. Here we restrict our analyses to the HCV antibody  
6 results.  
7  
8  
9  
10

11  
12 Data from the EDHS 2008 and EDHS 2014 were downloaded with permission from Measure  
13 DHS[28]. The data can be accessed through application to the DHS Program at  
14 <https://dhsprogram.com>. For purposes of this study, the EDHS individual database was merged  
15 with the HCV biomarker database, based on established guidelines for managing DHS data[27].  
16 All individuals with results for HCV antibody testing were included in the analysis.  
17  
18  
19  
20  
21  
22  
23  
24

### 25 ***Risk score derivation***

26  
27 Associations of HCV antibody positivity (seropositivity) with a priori variables that are easy to  
28 evaluate in a primary healthcare setting, and that can be included in a risk score, were  
29 investigated. These variables included sex (male versus female), age (5-year age strata), and type  
30 of place of residence (urban versus rural). Frequency distributions were generated to describe  
31 demographic and clinical profiles of tested individuals.  
32  
33  
34  
35  
36  
37  
38  
39

40 Chi-square tests and univariable logistic regression were implemented to investigate  
41 associations. Participants younger than 15 years of age were excluded as this age group was not  
42 included in the EDHS 2008 and has low HCV prevalence (Table S1)[6, 29-31]. Odds ratios  
43 (ORs), 95% confidence intervals (CIs), and p-values were reported. Covariates with p-values  
44  $\leq 0.1$  in univariable regression analysis were considered possibly associated with HCV  
45 seropositivity. These were included in the multivariable analysis for estimation of adjusted ORs  
46 (AORs) and associated 95% CIs and p-values. No other forward or backward elimination for  
47 variable selection was used. Covariates with p-values  $\leq 0.05$  in the multivariable model were  
48  
49  
50  
51  
52  
53  
54  
55  
56  
57  
58  
59  
60

1  
2  
3 considered predictors of HCV seropositivity. Univariable and multivariable analyses were  
4  
5 adjusted for sampling weights.  
6  
7

8 A risk score was constructed based on the  $\beta$ -coefficients obtained from the multivariable  
9  
10 regression model.  $\beta$ -coefficients were multiplied by a factor of 10 and then rounded to the  
11  
12 nearest integer. The total risk score was calculated by adding the individual scores. To keep the  
13  
14 score simple enough for use in primary healthcare and other general population settings, we did  
15  
16 not consider any interaction terms.  
17  
18

### 19 20 ***Performance and validation of the risk score*** 21

22  
23 A receiver operating characteristics (ROC) curve was plotted to investigate the performance of  
24  
25 the risk score in predicting HCV seropositivity at different score cut-offs. A larger area under the  
26  
27 curve (AUC), also called the c-index, indicates better performance of the risk score. The cut-off  
28  
29 for the score was determined by maximizing the sum of the sensitivity and specificity.  
30  
31

32 Sensitivity is the probability that the risk score will yield a positive diagnosis in a subject who is  
33  
34 truly HCV antibody-positive. Specificity is the probability that the risk score will yield a  
35  
36 negative diagnosis in a subject who is truly HCV antibody-negative.  
37  
38

39 Performance of the risk score was also investigated by estimating the positive predictive value  
40  
41 (PPV) and the negative predictive value (NPV) of the risk score. PPV is the probability that a  
42  
43 subject with a positive diagnosis per the risk score is truly HCV antibody-positive. NPV is the  
44  
45 probability that a subject with a negative diagnosis per the risk score is truly HCV antibody-  
46  
47 negative. The proportion of subjects who have scores greater than or equal to the cut-off of the  
48  
49 risk score was estimated to determine the proportion of individuals that need to be biochemically  
50  
51 tested for HCV antibodies.  
52  
53  
54  
55  
56  
57  
58  
59  
60

1  
2  
3 To validate the performance of the EDHS 2008 risk score, it was applied to the EDHS 2014 data,  
4 providing an independent validation with a dataset different from the one used for its derivation.  
5  
6 Performance diagnostics were subsequently assessed. Given the pronounced cohort effect in the  
7  
8 epidemiology of HCV infection in Egypt[6, 29-31], the age variable was adjusted to reflect the  
9  
10 6-year interval between the surveys. For example, individuals who were 11 years old in 2008  
11  
12 would have been 17 years old at the time of the second survey in 2014. The same approach was  
13  
14 also used to validate the EDHS 2014 risk score—it was applied to the EDHS 2008 database and  
15  
16 performance diagnostics were assessed.  
17  
18  
19  
20  
21

22 While the cut-off for the score was determined by maximizing the sum of sensitivity and  
23  
24 specificity, this cut-off can be adjusted as needed from a programmatic standpoint to optimize a  
25  
26 specific diagnostic metric, such as sensitivity instead of specificity. To illustrate this flexibility,  
27  
28 an additional analysis was incorporated featuring a variety of score cut-offs, resulting in diverse  
29  
30 values of sensitivity, specificity, PPV, and NPV. Such additional analysis enables program  
31  
32 managers and readers to discern the trade-offs among these diagnostic metrics and observe the  
33  
34 implications of selecting an alternative programmatic approach, such as prioritizing the  
35  
36 optimization of sensitivity over specificity.  
37  
38  
39  
40

41 Analyses were conducted in Stata version 16.1 (Stata Corporation, College Station, TX, USA).  
42  
43 The study was reported following the Strengthening the Reporting of Observational Studies in  
44  
45 Epidemiology (STROBE) guidelines (Table S2).  
46  
47

## 48 **RESULTS**

49  
50  
51 In the 2008 EDHS, 11,126 individuals 15-59 years of age were tested, of whom 1,571 were  
52  
53 antibody-positive[25]. The 2014 EDHS included children 1-14 years of age in addition to adults  
54  
55 15-59 years of age[26]. In this latter survey, 26,047 individuals were tested of whom 1,456 were  
56  
57  
58  
59  
60

antibody-positive[26].

Characteristics of individuals who were tested for HCV antibodies and the proportion of each population stratum that was HCV antibody-positive are shown in Table S1 for both of the EDHS surveys. Results of both surveys were consistent, taking into account the age shift in the national cohort with the passage of 6 years between the EDHS 2008 and EDHS 2014.

HCV seropositivity was strongly associated with sex, age, and place of residence in both national surveys (Table 1 and Table S3). Male sex and rural residence were associated with higher seropositivity. Seropositivity increased rapidly with age.

The 2008 and 2014 Egypt Hepatitis C Risk Scores derived using the EDHS 2008 and EDHS 2014 data, respectively, are shown in Figure 1. The 2008 Risk Score had a range of 0-41. The 2014 Risk Score had a range of 0-53. Both showed similar dependence on sex, age, and type of place of residence. Both demonstrated high and similar AUCs (Figure 2). The AUC was 0.77 (95% CI: 0.76-0.78) for the 2008 Risk Score and 0.78 (95% CI: 0.77-0.80) for the 2014 Risk Score. The highest sum of sensitivity and specificity was obtained at a score cut-off value of 22 for the 2008 Risk Score and at a cut-off of 34.5 for the 2014 Risk Score.

For the 2008 Risk Score, sensitivity was 73.7% (95% CI: 71.5-75.9%), specificity was 68.5% (95% CI: 67.5-69.4%), PPV was 27.8% (95% CI: 26.4-29.2%), and NPV was 94.1% (95% CI: 93.5-94.6%) (Table 2). For the 2014 Risk Score, sensitivity was 64.0% (95% CI: 61.5-66.6%), specificity was 78.2% (95% CI: 77.5-78.9%), PPV was 22.2% (95% CI: 20.9-23.5%), and NPV was 95.7% (95% CI: 95.4-96.1%). The proportion of the population 15-59 years of age that needed to be biochemically tested for HCV antibodies was 37.2% (95% CI: 36.3-38.1%) using the 2008 Risk Score and 25.5% (95% CI: 24.9-26.2%) using the 2014 Risk Score. Of all HCV-infected persons in the EDHS samples, application of this score would have diagnosed (that is

1  
2  
3 identified; sensitivity) 73.7% (95% CI: 71.5-75.9%) and 64.0% (95% CI: 61.5-66.6%) of all  
4  
5 HCV antibody-positive persons in samples of the EDHS 2008 and 2014, respectively.  
6  
7

8 When the 2008 Risk Score was applied to the EDHS 2014 data, the AUC was 0.75 (95% CI:  
9  
10 0.74-0.77), the sensitivity was 66.1% (95% CI: 63.5-68.6%), and the specificity was 72.3% (95%  
11  
12 CI: 71.5-73.1%) (Table 2). These performance indicators were similar to the original  
13  
14 performance indicators generated using the EDHS 2008 data, as well as to the performance  
15  
16 indicators of the 2014 Risk Score on the EDHS 2014 data. Therefore, this application validates  
17  
18 this risk score. A similar outcome was found when the 2014 Risk Score was applied to the EDHS  
19  
20 2008 data, also providing a validation of the 2014 risk score.  
21  
22  
23  
24

25 Figure 3 displays the proportion of HCV infections in the population that are diagnosed as a  
26  
27 function of the proportion of the population that needs to be tested to identify these infections,  
28  
29 using each of EDHS 2008 and EDHS 2014 data. The figure shows the effect of prioritization of  
30  
31 testing for those with higher to lower risk score. This provides a demonstration of the utility of  
32  
33 using the risk score: a large proportion of HCV infections can be diagnosed by testing only a  
34  
35 small proportion of the population. It is most efficient programmatically to start testing  
36  
37 individuals with the highest risk score and progressively moving on to those with lower and  
38  
39 lower risk scores. As testing is expanded to those with low risk scores, the yield in identifying  
40  
41 more HCV infections is very limited.  
42  
43  
44  
45

46 Table 3 illustrates the implications of selecting various score cut-offs, providing insight into the  
47  
48 trade-offs among different diagnostic metrics, as well as the proportion of the population  
49  
50 requiring biochemical testing and the proportion of all HCV-infected individuals identified  
51  
52 through the application of this score. For instance, by enhancing the specificity of the risk score,  
53  
54 the PPV increases, and the proportion of the population necessitating testing decreases. This  
55  
56  
57  
58  
59  
60

1  
2  
3 reduction in testing requirements helps alleviate costs and streamline the logistics of the test-and-  
4  
5 treat program. However, this enhanced program efficiency comes at the expense of lower NPV  
6  
7 and sensitivity, implying a smaller proportion of HCV-infected individuals in the population  
8  
9 being identified through the risk score.  
10  
11

## 12 13 **DISCUSSION**

14  
15 We demonstrated that a risk score that consists of few simple questions that are easy to evaluate  
16  
17 in a primary healthcare setting or implemented through a website or an app that helps persons  
18  
19 identify their risk of being HCV infected, provides an effective and non-invasive public health  
20  
21 tool to identify carriers of HCV infection and to link them to testing and treatment. Biochemical  
22  
23 testing methods to identify HCV infected persons are invasive and time-consuming and require  
24  
25 human and financial resources, as well as complex logistics, making them less scalable,  
26  
27 particularly in resource-limited settings. In contrast, initial screening using a risk score can be  
28  
29 easily administered or self-administered, is non-invasive, and requires minimal resources and  
30  
31 logistics. Therefore, HCV risk scores can be an indispensable strategy for the global response to  
32  
33 attain the target of HCV elimination as a public health problem by 2030.  
34  
35  
36  
37  
38

39 While the concept of a risk score shares similarities with risk-based testing, which has been  
40  
41 implemented in some countries, predominantly in higher-income nations[32-34], the risk score  
42  
43 approach transcends mere risk-based testing. It enables a broader application across various  
44  
45 settings and situations and can significantly contribute to raising awareness of the infection  
46  
47 among the general population. The risk score approach represents a tool that addresses several  
48  
49 public health needs simultaneously, extending the application of risk-based testing beyond  
50  
51 conventional healthcare settings. Moreover, it entails minimal costs and logistics, making it  
52  
53 feasible even in resource-limited settings.  
54  
55  
56  
57  
58  
59  
60

1  
2  
3 Remarkably, the risk score, comprising three simple questions, demonstrated considerable  
4 diagnostic accuracy, as evidenced by the values of various diagnostic metrics, including AUC,  
5 sensitivity, specificity, PPV, and NPV. Of particular note is the high NPV, ensuring that a  
6 negative result is highly unlikely to be a false negative, thereby obviating the need for  
7 individuals with a negative outcome using the score to undergo testing for HCV antibodies. The  
8 score also identified 73.7% and 64.0% of all HCV infections in the EDHS 2008 and EDHS 2014  
9 samples, respectively. Thus, the score fulfills its objective of facilitating the efficient  
10 identification of individuals with HCV infection while minimizing the necessity for conducting  
11 biochemical testing. This underscores the value of this approach in identifying as many HCV-  
12 infected persons as early as possible and initiating treatment before progression to serious  
13 clinical disease.

14  
15 This approach was demonstrated for Egypt, considering the availability of two EDHS surveys to  
16 derive and validate the score. The two scores exhibited comparable structures and diagnostic  
17 performances, with minor differences attributed to sampling variation of the same population  
18 across two distinct rounds of the EDHS surveys. Each score was validated by applying it to a  
19 database other than the one used to derive it. The latter application yielded a diagnostic  
20 performance that was comparable to the original diagnostic performance against the database  
21 used to originate it. This highlights how a single national survey for HCV infection may be  
22 sufficient to develop an effective risk score for this infection, and that can become an integral  
23 component of the national response to eliminate HCV infection.

24  
25 The approach demonstrated in this study can be applied in other countries, including those in the  
26 MENA region. In countries where nationally representative population-based surveys have been  
27 conducted, these surveys can serve as the basis for deriving the risk score, as was done in this

1  
2  
3 study. However, only three MENA countries—Egypt, Libya, and Pakistan—have conducted  
4 such surveys[25, 26, 35, 36]. For countries where such surveys are not available[10-16], the risk  
5 score can still be derived using data from available regional surveys. Alternatively, if regional  
6 surveys are not available, the effects of risk factors for infection can be pooled, either in terms of  
7 odds ratios or relative risks, using data from analytical studies[37]. These effects can also be  
8 derived from meta-regression analyses applied to all available HCV prevalence studies for each  
9 country[38-45].

10  
11 While this study focused on demonstrating the utility of this concept as a public health tool,  
12 actual application of this approach to different countries can be enhanced for even higher  
13 diagnostic accuracy. One extension could be adding more variables to the score in a manner  
14 tailored to the local epidemiology of each country. For instance, province or city of birth and/or  
15 current residence, prior exposure to an HCV mode of transmission[37], or history of HCV  
16 infection in the family, could be added, among others. Given that the risk of exposure to HCV  
17 infection varies immensely by at-risk population type and shows a distinctive hierarchy[46], an  
18 additional component to the score could be to integrate the at-risk population type as a  
19 variable[41, 46], thereby further enhancing the diagnostic accuracy of the score. Testing  
20 strategies, therefore, could be highly efficient in identifying HCV infected persons at a modest  
21 cost.

22  
23 However, caution must be exercised to prevent the creation of stigma associated with HCV  
24 infection or the use of an HCV risk score. For instance, it may not be feasible to include  
25 questions about stigmatized behaviors in the MENA context, such as injecting drug use or  
26 specific sexual practices, when the score is applied in general population settings like primary  
27 healthcare. However, such questions may be appropriate in other settings, such as voluntary  
28



1  
2  
3 counseling and testing (VCT) centers or outreach efforts by community organizations working  
4 with the most at-risk populations[47]. It is important also for the risk score to factor community  
5 acceptance in its design and implementation, ensuring it addresses the specific needs of certain  
6 groups, such as women of childbearing age in contexts where the risk of HCV vertical  
7 transmission is not negligible[48-50].  
8  
9

10  
11  
12 The application of HCV risk scores can be influenced by programmatic considerations and  
13 variations in context. This may necessitate prioritizing specific diagnostic metrics, such as  
14 sensitivity over specificity. The approach presented here demonstrates an inherent flexibility of  
15 the score, allowing adjustments to address specific programmatic needs, as illustrated by the  
16 analysis using different cut-off points (Table 3). However, it is critical to acknowledge the  
17 inherent trade-offs between diagnostic metrics. Optimizing one metric, such as sensitivity, will  
18 inevitably impact others, like specificity. Therefore, careful consideration is essential to align the  
19 score's cut-off with the specific programmatic context and its corresponding needs.  
20  
21  
22  
23  
24  
25  
26  
27  
28  
29  
30  
31  
32  
33

34 This study has limitations. For ease of use in primary healthcare and more broadly by the public,  
35 a risk score has to be simple. Accordingly, it cannot fully represent the complex epidemiology of  
36 HCV infection, such as interactions among risk factors. This risk score was derived for Egypt,  
37 which may not benefit from this risk score, given that this country has opted for mass testing of  
38 its entire population[17]. Derivation of a risk score typically requires at least one round of a  
39 population-based survey, ideally at the national level, but many countries may not have such  
40 survey data to be able to easily derive a risk score. The risk score was derived for a high-burden  
41 country, and utility of this approach still needs to be demonstrated for countries with low HCV  
42 prevalence. Nonetheless, this approach may prove to have higher utility in countries with low  
43 HCV prevalence than in countries with high HCV prevalence, as HCV epidemiology shows a  
44  
45  
46  
47  
48  
49  
50  
51  
52  
53  
54  
55  
56  
57  
58  
59  
60

1  
2  
3 clearer hierarchy in infection exposure risk in countries with concentrated HCV epidemics  
4  
5 compared to those with generalized HCV epidemics[46].  
6  
7

## 8 **Conclusions**

9

10  
11 An HCV risk score can be derived using only one round of a population-based survey and offers  
12  
13 an effective, simple, non-invasive strategy to identify carriers of HCV infection and to link them  
14  
15 to testing and treatment, at low cost. This public health tool can be implemented and used for  
16  
17 prioritizing populations for interventions with minimal logistical complexity and cost, especially  
18  
19 in resource-limited countries.  
20  
21  
22  
23  
24  
25  
26  
27  
28  
29  
30  
31  
32  
33  
34  
35  
36  
37  
38  
39  
40  
41  
42  
43  
44  
45  
46  
47  
48  
49  
50  
51  
52  
53  
54  
55  
56  
57  
58  
59  
60

1  
2  
3 **Acknowledgements** The authors are grateful for the administrative support of Ms. Adona  
4  
5 Canlas.  
6

7  
8 **Ethics approval** The study used anonymized publicly available data accessed through the  
9  
10 Demographic and Health Survey program; therefore, ethical approval or collection of informed  
11  
12 consent was not required.  
13

14  
15 **Contributors** REK conducted the data analyses with HC and NN. REK, NN, and LJA co-wrote  
16  
17 the first draft of the article. LJA conceived and led the design of the study, analyses, and drafting  
18  
19 the article. All authors contributed to drafting and revising the manuscript. All authors have read  
20  
21 and approved the final manuscript.  
22

23  
24 **Funding** This work was supported by the National Priorities Research Program (NPRP) [grant  
25  
26 number 12S-0216-190094] from the Qatar National Research Fund (a member of Qatar  
27  
28 Foundation). The statements made herein are solely the responsibility of the authors. The authors  
29  
30 are also grateful for infrastructure support provided by the Biostatistics, Epidemiology, and  
31  
32 Biomathematics Research Core at Weill Cornell Medicine-Qatar.  
33

34  
35  
36 **Competing interests** None declared.  
37

38  
39 **Patient consent for publication** Not required.  
40

41  
42 **Data availability statement** All data analyzed in this study can be accessed through application  
43  
44 to the DHS Program at <https://dhsprogram.com/> or by contacting [archive@dhsprogram.com](mailto:archive@dhsprogram.com).  
45  
46  
47  
48  
49  
50  
51  
52  
53  
54  
55  
56  
57  
58  
59  
60

**Table 1** Results of the multivariable regression analyses to derive the Egypt Hepatitis C Risk Score using data from EDHS 2008 and EDHS 2014

|                                   | EDHS 2008           |         |                   |                         | EDHS 2014           |         |                   |                         |
|-----------------------------------|---------------------|---------|-------------------|-------------------------|---------------------|---------|-------------------|-------------------------|
|                                   | aOR** (95% CI)      | p-value | $\beta^{\dagger}$ | Risk score <sup>§</sup> | aOR** (95% CI)      | p-value | $\beta^{\dagger}$ | Risk score <sup>§</sup> |
| <b>Sex</b>                        |                     |         |                   |                         |                     |         |                   |                         |
| Female                            | 1.00                |         | Ref               | 0                       | 1.00                |         | Ref               | 0                       |
| Male                              | 1.52 (1.34-1.73)    | <0.001  | 0.42              | 4                       | 1.62 (1.40-1.87)    | <0.001  | 0.48              | 5                       |
| <b>Age group (years)</b>          |                     |         |                   |                         |                     |         |                   |                         |
| 15-19                             | 1.00                |         |                   | 0                       | 1.00                |         |                   |                         |
| 20-24                             | 1.23 (0.89-1.69)    | 0.213   | 0.20              | 2                       | 3.30 (1.88-5.81)    | <0.001  | 1.19              | 12                      |
| 25-29                             | 1.60 (1.15-2.23)    | 0.005   | 0.47              | 5                       | 4.50 (2.60-7.79)    | <0.001  | 1.51              | 15                      |
| 30-34                             | 3.21 (2.35-4.39)    | <0.001  | 1.17              | 12                      | 7.41 (4.35-12.65)   | <0.001  | 2.00              | 20                      |
| 35-39                             | 3.89 (2.84-5.34)    | <0.001  | 1.36              | 14                      | 8.74 (5.13-14.88)   | <0.001  | 2.17              | 22                      |
| 40-44                             | 7.36 (5.47-9.90)    | <0.001  | 1.99              | 20                      | 13.03 (7.79-21.81)  | <0.001  | 2.57              | 26                      |
| 45-49                             | 10.34 (7.71-13.85)  | <0.001  | 2.34              | 23                      | 19.23 (11.66-31.69) | <0.001  | 2.96              | 30                      |
| 50-54                             | 16.43 (12.29-21.96) | <0.001  | 2.80              | 28                      | 41.11 (25.05-67.46) | <0.001  | 3.71              | 37                      |
| 55-59                             | 17.05 (12.50-23.26) | <0.001  | 2.84              | 28                      | 55.31 (33.59-91.06) | <0.001  | 4.01              | 40                      |
| <b>Type of place of residence</b> |                     |         |                   |                         |                     |         |                   |                         |
| Urban                             | 1.00                |         | Ref               | 0                       | 1.00                |         | Ref               | 0                       |
| Rural                             | 2.34 (2.0-2.7)      | <0.001  | 0.85              | 9                       | 2.15 (1.78-2.59)    | <0.001  | 0.76              | 8                       |

Abbreviations: aOR, Adjusted odds ratio; CI, Confidence interval; EDHS, Egypt Demographic and Health Survey; HCV, Hepatitis C virus; Ref, Reference category.

\*The analysis applied the EDHS sampling weights.

†The odds ratio was adjusted for sex, age, and type of place of residence.

‡ $\beta$ -coefficients were based on the multivariable regression analysis.

§The risk score was calculated by multiplying the  $\beta$  coefficient by 10 and then rounding the result to the nearest integer.

**Figure 1.** Mathematical formula of the derived Egypt Hepatitis C Risk Score. A) Egypt Hepatitis C Risk Score using the EDHS 2008. B) Egypt Hepatitis C Risk Score using the EDHS 2014.

A.

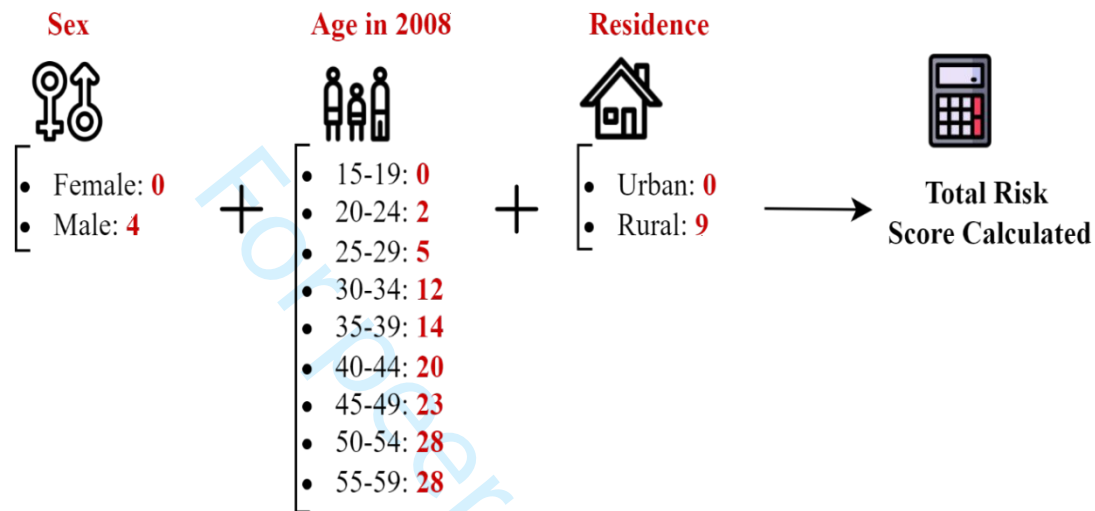

B.

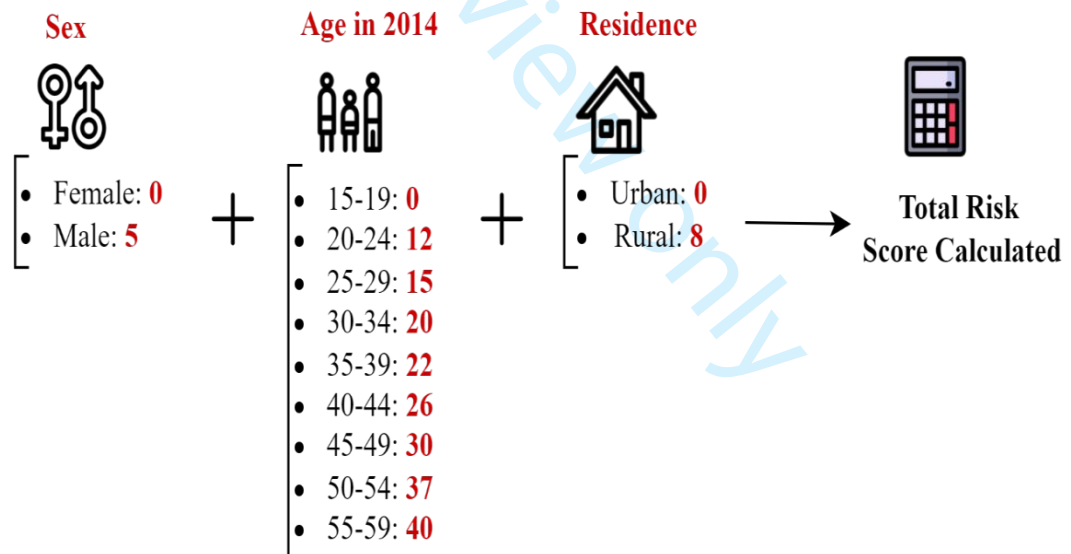

Abbreviations: EDHS, Egypt Demographic and Health Survey; ROC, receiver operating characteristics.

The two scores exhibited comparable structures and diagnostic performances, with minor differences attributed to sampling variation of the same population across two distinct rounds of the EDHS surveys. Details on the derivation of these scores are provided in the Methods and Results sections.

**Figure 2.** Diagnostic performance of the Egypt Hepatitis C Risk Score using the area under the (ROC) curve. A) Using the EDHS 2008 data. B) Using the EDHS 2014 data.

**A.**

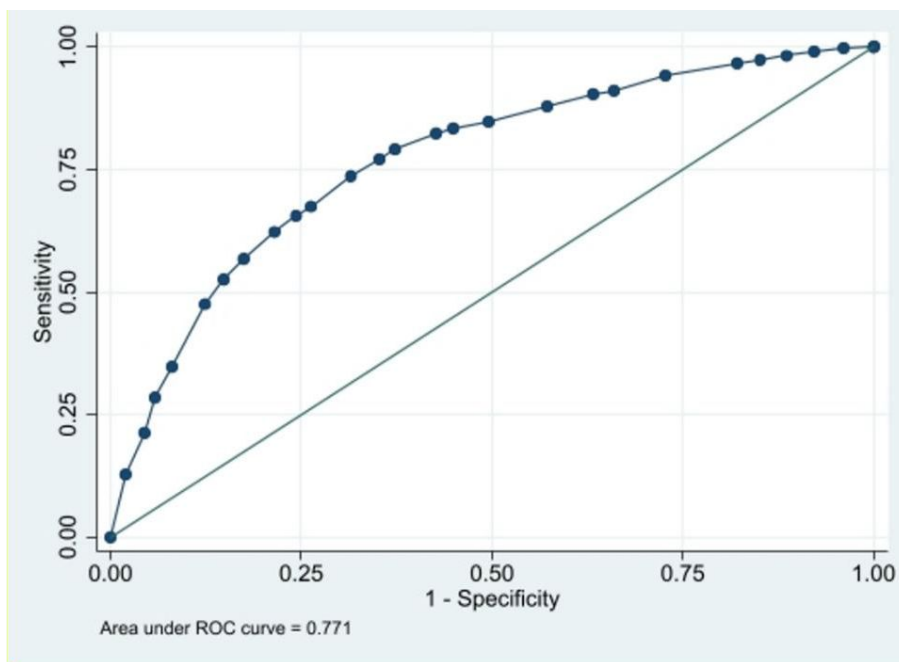

**B.**

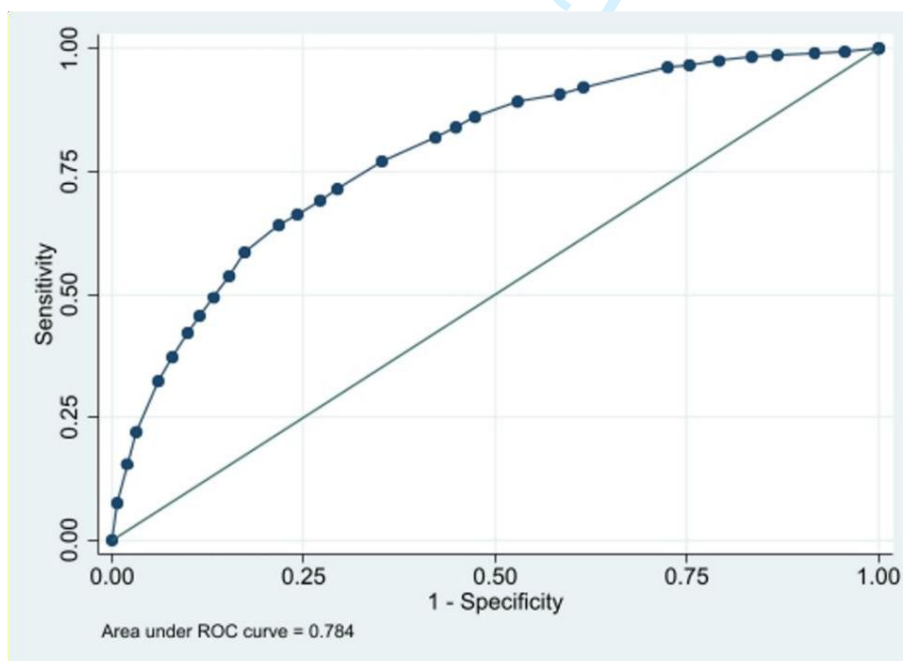

Abbreviations: EDHS, Egypt Demographic and Health Survey; ROC, receiver operating characteristics.

**Table 2** Performance of the Egypt Hepatitis C Risk Score

|                                                | AUC<br>(95% CI)      | Risk score cut-off* | Sensitivity<br>(95% CI) | Specificity<br>(95% CI) | PPV<br>(95% CI)     | NPV<br>(95% CI)     | Proportion needing testing<br>(95% CI) |
|------------------------------------------------|----------------------|---------------------|-------------------------|-------------------------|---------------------|---------------------|----------------------------------------|
| <b>Derived risk scores</b>                     |                      |                     |                         |                         |                     |                     |                                        |
| Risk score derived using the EDHS 2008         | 0.77<br>(0.76-0.78)  | 22.0                | 73.7<br>(71.5-75.9)     | 68.5<br>(67.5-69.4)     | 27.8<br>(26.4-29.2) | 94.1<br>(93.5-94.6) | 37.2<br>(36.3-38.1)                    |
| Risk score derived using the EDHS 2014         | 0.78<br>(0.77- 0.80) | 34.5                | 64.0<br>(61.5-66.6)     | 78.2<br>(77.5-78.9)     | 22.2<br>(20.9-23.5) | 95.7<br>(95.4-96.1) | 25.5<br>(24.9-26.2)                    |
| <b>Validation of risk scores</b>               |                      |                     |                         |                         |                     |                     |                                        |
| 2008 risk score applied to the EDHS data 2014† | 0.75<br>(0.74-0.77)  | 22.0                | 66.1<br>(63.5-68.6)     | 72.3<br>(71.5-73.1)     | 21.9<br>(20.6-23.2) | 94.8<br>(94.3-95.2) | 31.7<br>(30.9-32.5)                    |
| 2014 risk score applied to the EDHS data 2008‡ | 0.76<br>(0.74-0.77)  | 33.5                | 70.0<br>(67.5-72.6)     | 70.0<br>(69.0-70.9)     | 24.7<br>(23.3-26.1) | 94.3<br>(93.7-94.9) | 34.6<br>(33.7-35.5)                    |

Abbreviations: AUC, Area under the curve; EDHS, Egypt Demographic and Health Survey; HCV, Hepatitis C virus; NPV, Negative predictive value; PPV, Positive predictive value.

\*The optimal cut-off for the score was determined by maximizing the sum of the sensitivity and specificity.

†The risk score assumes the age of the individuals in 2008 in order to account for the age shift.

‡The risk score assumes the age of the individuals in 2014 in order to account for the age shift.

**Figure 3.** Proportion of HCV infections in the population that are diagnosed as a function of the proportion of the population that needs to be tested to identify these infections. The figure shows the effect of prioritization of testing for those with higher to lower risk score. A) Using the EDHS 2008 data. B) Using the EDHS 2014 data.

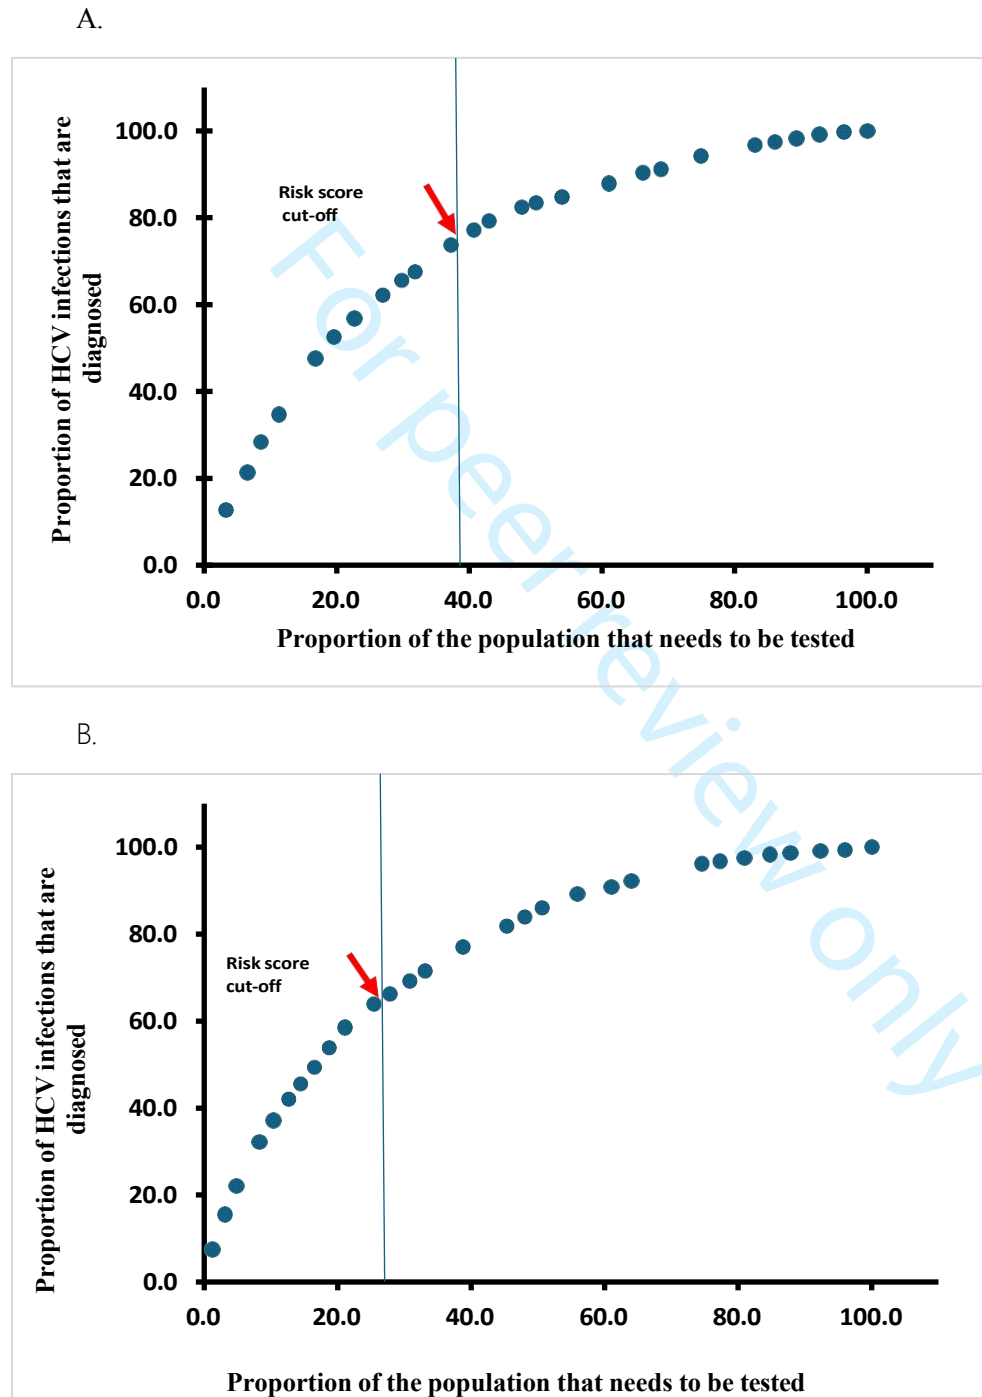



**Table 3** Implications of selecting various score cutoffs on the different diagnostic metrics.

| Risk score cut-off           | Sensitivity (95% CI) | Specificity (95% CI) | PPV (95% CI)      | NPV (95% CI)     | Proportion needing testing (95% CI) | Proportion that are diagnosed (95% CI) |
|------------------------------|----------------------|----------------------|-------------------|------------------|-------------------------------------|----------------------------------------|
| <b>EDHS 2008 Risk Score*</b> |                      |                      |                   |                  |                                     |                                        |
| ≥2.0                         | 99.8 (99.4-100.0)    | 3.9 (3.5-4.3)        | 14.6 (13.9-15.3)  | 99.2 (97.7-99.8) | 96.5 (96.2-96.8)                    | 99.8 (99.4-100.0)                      |
| ≥4.0                         | 99.1 (98.5-99.5)     | 7.8 (7.3-8.4)        | 15.0 (14.3-15.7)  | 98.2 (96.9-99.0) | 92.8 (92.8-93.2)                    | 99.1 (98.1-99.5)                       |
| ≥5.0                         | 98.2 (97.4-98.8)     | 11.4 (10.8-12.1)     | 15.4 (14.7-16.1)  | 97.5 (96.4-98.3) | 89.3 (88.8-89.9)                    | 98.2 (97.4-98.8)                       |
| ≥6.0                         | 97.5 (96.5-98.2)     | 14.8 (14.1-15.6)     | 15.8 (15.1-16.6)  | 97.3 (96.3-98.0) | 86.1 (85.5-86.7)                    | 97.5 (96.6-98.2)                       |
| ≥9.0                         | 96.8 (95.8-97.6)     | 17.9 (17.1-18.7)     | 16.2 (15.5-17.0)  | 97.1 (96.2-97.8) | 83.2 (82.5-83.9)                    | 96.8 (95.8-97.6)                       |
| ≥11.0                        | 94.2 (92.9-95.3)     | 27.3 (26.4-28.2)     | 17.6 (16.7-18.4)  | 96.6 (95.6-97.3) | 74.9 (74.1-75.7)                    | 94.2 (92.9-95.3)                       |
| ≥12.0                        | 91.2 (89.6-92.5)     | 34.0 (33.1-35.0)     | 18.5 (17.6-19.4)  | 95.9 (95.2-96.5) | 68.9 (68.0-69.7)                    | 91.2 (89.6-92.5)                       |
| ≥13.0                        | 90.5 (88.9-91.9)     | 36.8 (35.8-37.7)     | 19.0 (18.2-20.0)  | 95.9 (95.2-96.5) | 66.3 (65.4-67.1)                    | 90.5 (88.9-91.9)                       |
| ≥14.0                        | 87.9 (86.2-89.5)     | 42.8 (41.8-43.8)     | 20.2 (19.2-21.1)  | 95.6 (94.9-96.2) | 61.0 (60.1-61.9)                    | 87.9 (86.2-89.5)                       |
| ≥15.0                        | 84.8 (82.9-86.5)     | 50.5 (49.5-51.5)     | 22.1 (21.0-23.1)  | 95.3 (94.7-95.8) | 54.0 (53.1-54.9)                    | 84.8 (82.9-86.5)                       |
| ≥16.0                        | 83.5 (81.5-85.3)     | 55.1 (54.0-56.1)     | 23.74 (22.6-24.9) | 95.3 (94.7-95.8) | 50.1 (49.2-50.9)                    | 83.5 (81.5-85.3)                       |
| ≥18.0                        | 82.4 (80.5-84.3)     | 57.3 (56.3-58.3)     | 24.1 (23.0-25.3)  | 95.2 (94.6-95.7) | 47.9 (47.0-48.8)                    | 82.4 (80.5-84.3)                       |
| ≥20.0                        | 79.1 (77.0-81.1)     | 62.7 (61.7-63.7)     | 25.8 (24.6-27.1)  | 94.8 (94.2-95.3) | 43.0 (42.1-43.9)                    | 79.1 (77.0-81.1)                       |
| ≥21.0                        | 77.1 (75.0-79.2)     | 64.7 (63.8-65.7)     | 26.5 (25.2-27.8)  | 94.5 (93.9-95.0) | 40.8 (39.9-41.6)                    | 77.2 (75.0-79.2)                       |
| ≥23.0                        | 73.7 (71.5-78.9)     | 68.5 (67.5-69.4)     | 27.8 (26.4-29.2)  | 94.1 (93.5-94.6) | 37.2 (36.3-38.1)                    | 73.7 (71.5-75.9)                       |
| ≥24.0                        | 67.5 (65.1-69.8)     | 73.7 (72.8-74.6)     | 29.7 (28.2-31.2)  | 93.3 (92.6-93.8) | 31.8 (30.9-32.6)                    | 67.5 (65.1-69.8)                       |
| ≥25.0                        | 65.6 (63.2-67.9)     | 75.7 (74.8-76.5)     | 30.7 (29.1-32.3)  | 93.0 (92.4-93.6) | 29.8 (29.0-30.6)                    | 65.6 (63.2-67.9)                       |
| ≥27.0                        | 62.3 (59.8-64.7)     | 78.5 (77.7-73.3)     | 32.3 (30.6-34.0)  | 92.7 (92.1-93.2) | 27.0 (26.2-27.8)                    | 62.3 (59.8-64.7)                       |
| ≥28.0                        | 56.7 (54.2-59.2)     | 82.6 (81.8-83.3)     | 34.9 (33.0-36.8)  | 92.1 (91.5-92.6) | 22.7 (21.9-23.4)                    | 56.7 (54.2-59.2)                       |
| ≥29.0                        | 52.5 (50.0-55.0)     | 85.1 (84.4-85.8)     | 36.7 (34.8-38.8)  | 91.6 (91.0-92.2) | 19.6 (18.9-20.3)                    | 52.5 (50.0-55.0)                       |
| ≥32.0                        | 47.6 (45.1-50.1)     | 87.6 (86.9-88.3)     | 38.7 (36.5-40.9)  | 91.0 (90.4-91.6) | 16.8 (16.2-17.5)                    | 47.6 (45.1-50.1)                       |
| ≥33.0                        | 34.7 (32.3-37.1)     | 92.0 (91.4-92.5)     | 41.5 (38.8-44.2)  | 89.5 (88.9-90.1) | 11.3 (10.7-11.9)                    | 34.7 (32.3-37.1)                       |
| ≥36.0                        | 28.4 (26.2-30.7)     | 94.2 (93.7-94.7)     | 44.6 (41.4-47.7)  | 88.9 (88.3-89.5) | 8.6 (8.1-9.1)                       | 28.4 (26.2-30.7)                       |
| ≥37.0                        | 21.3 (19.3-23.4)     | 95.6 (95.2-96.0)     | 44.3 (40.7-47.9)  | 88.1 (87.4-88.7) | 6.5 (6.1-7.0)                       | 21.3 (19.3-23.4)                       |
| ≥41.0                        | 12.7 (11.1-14.5)     | 98.1 (97.8-98.3)     | 51.8 (46.7-56.9)  | 87.2 (86.6-87.9) | 3.3 (3.0-3.6)                       | 12.7 (11.1-14.5)                       |
| <b>EDHS 2014 Risk Score*</b> |                      |                      |                   |                  |                                     |                                        |
| ≥5.0                         | 99.4 (98.8-99.7)     | 4.3 (4.0-4.7)        | 9.1 (8.7-9.6)     | 98.6 (97.3-99.4) | 96.0 (95.7-96.3)                    | 99.4 (98.8-99.7)                       |
| ≥8.0                         | 99.2 (98.5-99.6)     | 8.3 (7.9-8.9)        | 9.5 (9.0-10.0)    | 99.0 (98.3-99.5) | 92.3 (91.9-92.7)                    | 99.2 (98.5-99.6)                       |
| ≥12.0                        | 98.7 (97.9-99.2)     | 13.2 (12.6-13.7)     | 9.9 (9.4-10.4)    | 99.0 (98.5-99.4) | 87.9 (87.3-88.3)                    | 98.7 (97.9-99.2)                       |
| ≥13.0                        | 98.3 (97.5-98.9)     | 16.5 (15.9-17.1)     | 10.2 (9.7-10.8)   | 99.0 (98.5-99.4) | 84.7 (84.2-85.3)                    | 98.3 (97.5-98.9)                       |
| ≥15.0                        | 97.5 (96.6-98.3)     | 20.7 (20.1-21.4)     | 10.7 (10.1-11.2)  | 98.9 (98.4-99.2) | 80.9 (80.3-81.5)                    | 97.5 (96.6-98.3)                       |
| ≥17.0                        | 96.7 (95.6-97.5)     | 24.7 (24.0-25.4)     | 11.1 (10.5-11.6)  | 98.7 (98.3-99.1) | 77.2 (76.5-77.8)                    | 96.7 (95.6-97.5)                       |
| ≥20.0                        | 96.2 (95.0-97.1)     | 27.5 (26.7-28.2)     | 11.4 (10.8-12.0)  | 98.7 (98.3-99.0) | 74.5 (73.9-75.2)                    | 96.2 (95.0-97.1)                       |
| ≥22.0                        | 92.2 (90.7-93.6)     | 38.5 (37.7-39.2)     | 12.7 (12.0-13.3)  | 98.1 (97.7-98.4) | 64.0 (63.3-64.7)                    | 92.2 (90.7-93.4)                       |
| ≥23.0                        | 90.8 (89.2-92.3)     | 41.5 (40.7-42.4)     | 13.1 (12.4-13.8)  | 97.9 (97.5-98.2) | 61.0 (60.3-61.8)                    | 90.8 (89.2-92.3)                       |
| ≥25.0                        | 89.2 (87.4-90.7)     | 47.1 (46.3-47.9)     | 14.0 (13.3-14.8)  | 97.8 (97.5-98.2) | 55.9 (55.2-56.7)                    | 89.2 (87.4-90.7)                       |
| ≥26.0                        | 86.1 (84.1-87.8)     | 52.6 (51.8-53.4)     | 15.0 (14.2-15.8)  | 97.5 (97.1-97.8) | 50.6 (49.9-51.4)                    | 86.1 (84.1-87.8)                       |
| ≥27.0                        | 83.9 (81.9-85.8)     | 55.1 (54.3-55.9)     | 15.3 (14.5-16.2)  | 97.3 (96.9-97.6) | 48.1 (47.3-48.9)                    | 83.9 (81.3-85.8)                       |
| ≥28.0                        | 81.9 (79.8-84.0)     | 57.8 (57.0-58.6)     | 15.8 (15.0-16.7)  | 97.1 (96.7-97.4) | 45.5 (44.7-46.2)                    | 81.9 (79.8-83.9)                       |

|       |                  |                  |                  |                  |                  |                  |
|-------|------------------|------------------|------------------|------------------|------------------|------------------|
| ≥30.0 | 77.1 (74.8-79.2) | 64.8 (64.0-65.6) | 17.5 (16.6-18.5) | 96.7 (96.3-97.0) | 38.8 (38.0-39.5) | 77.1 (74.8-79.2) |
| ≥31.0 | 71.4 (69.0-73.8) | 70.6 (69.8-71.3) | 19.0 (18.0-20.1) | 96.2 (95.8-96.6) | 33.1 (32.3-33.8) | 71.4 (69.0-73.8) |
| ≥33.0 | 69.1 (66.7-71.5) | 72.8 (72.1-73.5) | 19.8 (18.7-20.9) | 96.1 (95.7-96.4) | 30.8 (30.1-31.5) | 69.1 (66.7-71.5) |
| ≥34.0 | 66.2 (63.7-68.7) | 75.9 (75.2-76.6) | 21.0 (19.8-22.2) | 95.9 (95.5-96.2) | 27.8 (27.1-28.5) | 66.2 (63.7-68.7) |
| ≥35.0 | 64.1 (61.5-66.6) | 78.2 (77.5-78.9) | 22.2 (20.9-23.5) | 95.7 (95.4-96.1) | 25.5 (24.9-26.2) | 64.1 (61.5-66.6) |
| ≥37.0 | 58.5 (55.9-61.1) | 82.7 (82.0-83.3) | 24.6 (23.2-26.1) | 95.4 (95.0-95.7) | 21.1 (20.5-21.7) | 58.5 (55.9-61.1) |
| ≥38.0 | 53.7 (51.1-56.3) | 84.7 (84.1-85.2) | 25.3 (23.8-26.9) | 95.0 (94.6-95.3) | 18.7 (18.1-19.3) | 53.7 (51.1-56.3) |
| ≥39.0 | 49.3 (46.7-52.0) | 86.7 (86.1-87.2) | 26.4 (24.7-28.1) | 94.5 (94.2-95.0) | 16.5 (15.9-17.1) | 49.3 (46.7-52.0) |
| ≥40.0 | 45.6 (43.0-48.2) | 88.6 (88.1-89.1) | 27.9 (26.1-29.8) | 94.4 (94.0-94.8) | 14.4 (13.1-15.0) | 45.6 (43.0-48.2) |
| ≥42.0 | 42.1 (39.5-44.7) | 90.1 (89.6-90.6) | 29.2 (27.3-31.3) | 94.1 (93.7-94.5) | 12.7 (12.2-13.2) | 42.1 (39.5-44.7) |
| ≥43.0 | 37.2 (34.6-39.7) | 92.1 (91.7-92.6) | 31.4 (29.1-33.6) | 93.8 (93.4-94.2) | 10.4 (9.9-10.8)  | 37.2 (34.6-39.7) |
| ≥45.0 | 32.3 (29.8-34.8) | 94.0 (93.6-94.4) | 34.3 (31.7-36.9) | 93.5 (93.1-93.9) | 8.3 (7.9-8.7)    | 32.3 (29.8-34.8) |
| ≥48.0 | 22.0 (19.9-24.3) | 96.8 (96.5-97.1) | 40.0 (36.6-43.6) | 92.8 (92.2-93.2) | 4.8 (4.5-5.1)    | 22.0 (19.9-24.3) |
| ≥50.0 | 15.4 (13.6-17.4) | 98.1 (97.8-98.3) | 43.7 (39.3-48.2) | 92.3 (91.9-92.7) | 3.1 (2.8-3.4)    | 15.4 (13.6-17.4) |
| ≥53.0 | 7.4 (6.1-8.9)    | 99.3 (99.2-99.4) | 51.5 (44.4-58.5) | 91.8 (91.4-92.3) | 1.3 (1.1-1.4)    | 7.4 (6.1-8.9)    |

Abbreviations: AUC, Area under the curve; EDHS, Egypt Demographic and Health Survey; HCV, Hepatitis C virus; NPV, Negative predictive value; PPV, Positive predictive value.

\*The AUC for the derived risk score using the EDHS 2008 was 0.77 (95% CI: 0.76-0.78).

†The AUC for the derived risk score using the EDHS 2014 was 0.78 (95% CI: 0.77-0.80).

## References

1. Stanaway, J.D., et al., *The global burden of viral hepatitis from 1990 to 2013: findings from the Global Burden of Disease Study 2013*. The Lancet, 2016. **388**(10049): p. 1081-1088.
2. World Health Organization, *Combating hepatitis B and C to reach elimination by 2030: advocacy brief*. 2016, World Health Organization.
3. Lauer, G.M. and B.D. Walker, *Hepatitis C virus infection*. New England journal of medicine, 2001. **345**(1): p. 41-52.
4. World Health Organization. *Hepatitis C*. 2021 27 July 2021; Available from: <https://www.who.int/news-room/fact-sheets/detail/hepatitis-c>.
5. Calvaruso, V. and A. Craxi, *Hepatic benefits of HCV cure*. Journal of Hepatology, 2020. **73**(6): p. 1548-1556.
6. Ayoub, H.H. and L.J. Abu-Raddad, *Impact of treatment on hepatitis C virus transmission and incidence in Egypt: A case for treatment as prevention*. J Viral Hepat, 2017. **24**(6): p. 486-495.
7. Ayoub, H.H. and L.J. Abu-Raddad, *Treatment as prevention for hepatitis C virus in Pakistan: mathematical modelling projections*. BMJ Open, 2019. **9**(5): p. e026600.
8. World Health Organization, *Global health sector strategy on viral hepatitis 2016-2021. Towards ending viral hepatitis*. 2016, World Health Organization.
9. World Health Organization, *Global hepatitis report 2017*. 2017, World Health Organization.
10. World Health Organization, *Epidemiology of hepatitis C virus in the WHO Eastern Mediterranean Region: implications for strategic action*. 2020.
11. Chemaitelly, H., et al., *The epidemiology of hepatitis C virus in Afghanistan: systematic review and meta-analysis*. International Journal of Infectious Diseases, 2015. **40**: p. 54-63.
12. Mohamoud, Y.A., S. Riome, and L.J. Abu-Raddad, *Epidemiology of hepatitis C virus in the Arabian Gulf countries: Systematic review and meta-analysis of prevalence*. International Journal of Infectious Diseases, 2016. **46**: p. 116-125.
13. Chemaitelly, H., K. Chaabna, and L.J. Abu-Raddad, *The Epidemiology of Hepatitis C Virus in the Fertile Crescent: Systematic Review and Meta-Analysis*. PLOS ONE, 2015. **10**(8): p. e0135281.
14. Fadlalla, F.A., et al., *The Epidemiology of Hepatitis C Virus in the Maghreb Region: Systematic Review and Meta-Analyses*. PloS one, 2015. **10**(3): p. e0121873.
15. Chaabna, K., S.P. Kouyoumjian, and L.J. Abu-Raddad, *Hepatitis C virus epidemiology in Djibouti, Somalia, Sudan, and Yemen: systematic review and meta-analysis*. PloS one, 2016. **11**(2): p. e0149966.
16. Mahmud, S., V. Akbarzadeh, and L.J. Abu-Raddad, *The epidemiology of hepatitis C virus in Iran: Systematic review and meta-analyses*. Sci Rep, 2018. **8**(1): p. 150.
17. Waked, I., et al., *Screening and Treatment Program to Eliminate Hepatitis C in Egypt*. N Engl J Med, 2020. **382**(12): p. 1166-1174.
18. Al Kanaani, Z., et al., *The epidemiology of hepatitis C virus in Pakistan: systematic review and meta-analyses*. R Soc Open Sci, 2018. **5**(4): p. 180257.
19. Ayoub, H.H., Z. Al Kanaani, and L.J. Abu-Raddad, *Characterizing the temporal evolution of the hepatitis C virus epidemic in Pakistan*. J Viral Hepat, 2018. **25**(6): p. 670-679.

20. Mahmud, S., Z. Al Kanaani, and L.J. Abu-Raddad, *Characterization of the hepatitis C virus epidemic in Pakistan*. BMC Infect Dis, 2019. **19**(1): p. 809.
21. Noble, D., et al., *Risk models and scores for type 2 diabetes: systematic review*. Bmj, 2011. **343**.
22. Collins, G.S., et al., *Developing risk prediction models for type 2 diabetes: a systematic review of methodology and reporting*. BMC medicine, 2011. **9**(1): p. 1-14.
23. Brown, N., et al., *Risk scores based on self-reported or available clinical data to detect undiagnosed type 2 diabetes: a systematic review*. Diabetes research and clinical practice, 2012. **98**(3): p. 369-385.
24. Awad, S.F., et al., *A diabetes risk score for Qatar utilizing a novel mathematical modeling approach to identify individuals at high risk for diabetes*. Scientific reports, 2021. **11**(1): p. 1-10.
25. El-Zanaty, F. and A. Way, *Egypt Demographic and Health Survey 2008*. Cairo, Egypt Ministry of Health, El Zanaty and Associates, and Macro International. 2009.
26. El-Zanaty, F., *Egypt Health Issue Survey 2015*. Cairo, Egypt and Rockville, Maryland, USA: Ministry of Health and Population and ICF International. 2015.
27. Rutstein, S.O. and G. Rojas, *Guide to DHS statistics*. Calverton, MD: ORC Macro, 2006. **38**.
28. MEASURE DHS. *The DHS Program Demographic and Health Surveys*. . Available from: <https://dhsprogram.com/>.
29. Ayoub, H.H., et al., *Characterizing the historical role of parenteral antischistosomal therapy in hepatitis C virus transmission in Egypt*. International journal of epidemiology, 2020. **49**(3): p. 798-809.
30. Mohamoud, Y.A., et al., *The epidemiology of hepatitis C virus in Egypt: a systematic review and data synthesis*. BMC infectious diseases, 2013. **13**(1): p. 1-21.
31. Kouyoumjian, S.P., H. Chemaitelly, and L.J. Abu-Raddad, *Characterizing hepatitis C virus epidemiology in Egypt: systematic reviews, meta-analyses, and meta-regressions*. Scientific reports, 2018. **8**(1): p. 1-17.
32. Jovanovic, M.R., et al., *Does the Strategy of Risk Group Testing for Hepatitis C Hit the Target?* Frontiers in Pharmacology, 2017. **8**.
33. Smart, A., et al., *Identification of Risk Factors for Testing of Hepatitis C in Non-Birth Cohort Patients: Is Universal Screening Necessary?* J Addict Med, 2021. **15**(2): p. 109-112.
34. Jordan, A.E. and D.C. Perlman, *The Shift in Emphasis From Risk-Based to Age-Based Hepatitis C Virus (HCV) Testing in the US Tends to Remove Injection Drug Use From Discourse on HCV*. Subst Use Misuse, 2017. **52**(3): p. 340-350.
35. Qureshi, H., et al., *Prevalence of hepatitis B and C viral infections in pakistan: Findings of a national survey appealing for effective prevention and control measures. [French]*. Eastern Mediterranean Health Journal, 2010. **16**(SUPPL.): p. S15-23.
36. Daw, M.A. and A. El-Bouzedi, *Prevalence of hepatitis B and hepatitis C infection in Libya: results from a national population based survey*. BMC Infect Dis, 2014. **14**: p. 17.
37. Mahmud, S., et al., *Individual-level key associations and modes of exposure for hepatitis C virus infection in the Middle East and North Africa: a systematic synthesis*. Ann Epidemiol, 2018. **28**(7): p. 452-461.
38. Harfouche, M., et al., *Hepatitis C virus viremic rate in the Middle East and North Africa: Systematic synthesis, meta-analyses, and meta-regressions*. PLoS One, 2017. **12**(10): p.

- e0187177.
39. Harfouche, M., et al., *Epidemiology of hepatitis C virus among hemodialysis patients in the Middle East and North Africa: systematic syntheses, meta-analyses, and meta-regressions*. *Epidemiol Infect*, 2017. **145**(15): p. 3243-3263.
  40. Heijnen, M., G.R. Mumtaz, and L.J. Abu-Raddad, *Status of HIV and hepatitis C virus infections among prisoners in the Middle East and North Africa: review and synthesis*. *J Int AIDS Soc*, 2016. **19**(1): p. 20873.
  41. Mahmud, S., et al., *Hepatitis C Virus Infection in Populations With Liver-Related Diseases in the Middle East and North Africa*. *Hepatol Commun*, 2020. **4**(4): p. 577-587.
  42. Mahmud, S., et al., *Characterizing trends and associations for hepatitis C virus antibody prevalence in the Middle East and North Africa: meta-regression analyses*. *Sci Rep*, 2022. **12**(1): p. 20637.
  43. Mahmud, S., et al., *The status of hepatitis C virus infection among people who inject drugs in the Middle East and North Africa*. *Addiction*, 2020. **115**(7): p. 1244-1262.
  44. Mohamoud, Y.A., F.D. Miller, and L.J. Abu-Raddad, *Potential for human immunodeficiency virus parenteral transmission in the Middle East and North Africa: an analysis using hepatitis C virus as a proxy biomarker*. *World J Gastroenterol*, 2014. **20**(36): p. 12734-52.
  45. Mahmud, S., et al., *Key associations for hepatitis C virus genotypes in the Middle East and North Africa*. *J Med Virol*, 2020. **92**(3): p. 386-393.
  46. Chemaitelly, H., et al., *Who to Test for Hepatitis C Virus in the Middle East and North Africa?: Pooled Analyses of 2,500 Prevalence Measures, Including 49 Million Tests*. *Hepatol Commun*, 2019. **3**(3): p. 325-339.
  47. Mumtaz, G.R., et al., *Status of the HIV epidemic in key populations in the Middle East and north Africa: knowns and unknowns*. *Lancet HIV*, 2022. **9**(7): p. e506-e516.
  48. Benova, L., S.F. Awad, and L.J. Abu-Raddad, *Estimate of vertical transmission of Hepatitis C virus in Pakistan in 2007 and 2012 birth cohorts*. *J Viral Hepat*, 2017. **24**(12): p. 1177-1183.
  49. Benova, L., et al., *Estimation of hepatitis C virus infections resulting from vertical transmission in Egypt*. *Hepatology*, 2015. **61**(3): p. 834-42.
  50. Benova, L., et al., *Vertical transmission of hepatitis C virus: systematic review and meta-analysis*. *Clin Infect Dis*, 2014. **59**(6): p. 765-73.

**Figure 1.** Diagnostic performance of the Egypt Hepatitis C Risk Score using the area under the (ROC) curve. A) Using the EDHS 2008 data. B) Using the EDHS 2014 data.

**A.**

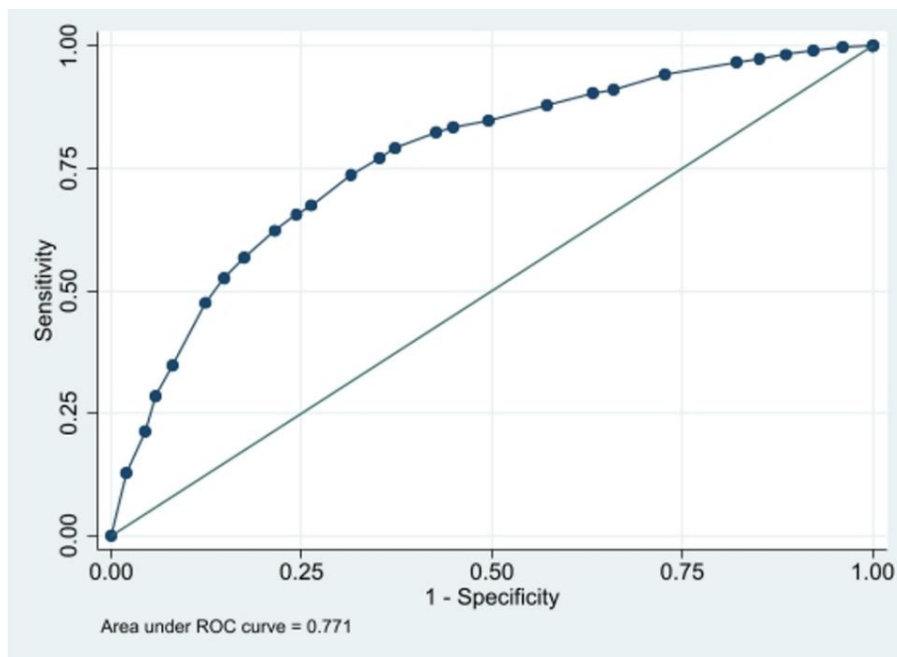

**B.**

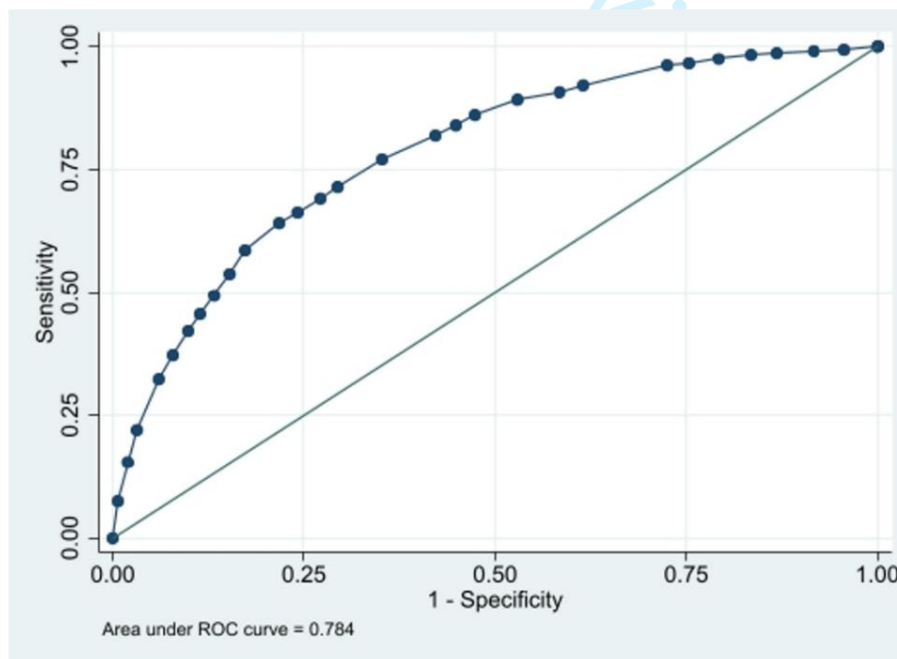

Abbreviations: EDHS, Egypt Demographic and Health Survey; ROC, receiver operating characteristics.

**Figure 2.** Proportion of HCV infections in the population that are diagnosed as a function of the proportion of the population that needs to be tested to identify these infections. The figure shows the effect of prioritization of testing for those with higher to lower risk score. A) Using the EDHS 2008 data. B) Using the EDHS 2014 data.

**A.**

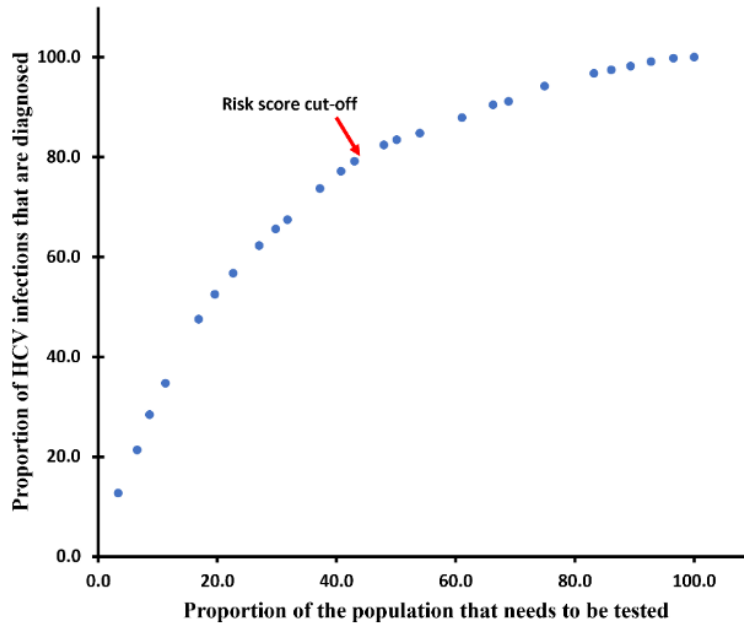

**B.**

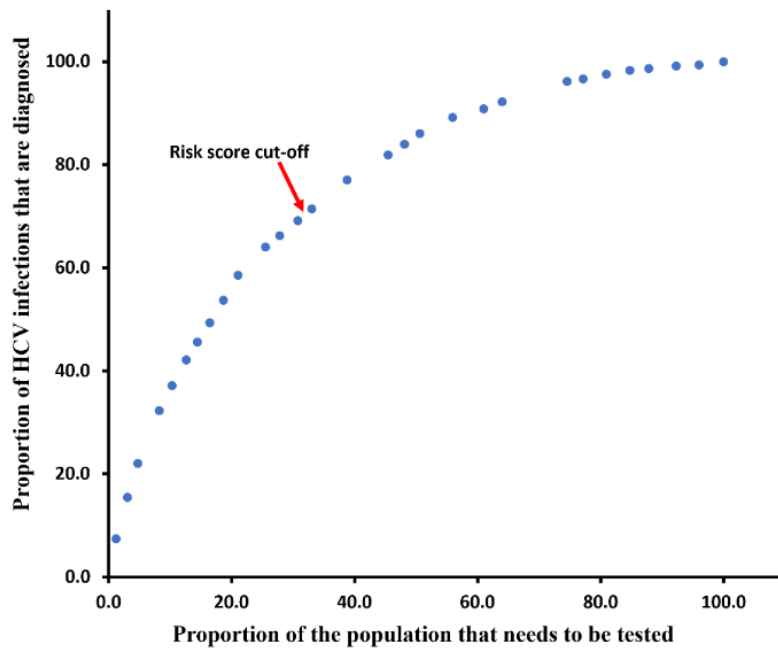

Abbreviations: EDHS, Egypt Demographic and Health Survey; HCV, Hepatitis C virus.

**Table S1** Characteristics of individuals tested for HCV antibodies in the EDHS 2008 and 2014

| Characteristics                   | EDHS 2008        |                                      |           | EDHS 2014        |                                      |         |
|-----------------------------------|------------------|--------------------------------------|-----------|------------------|--------------------------------------|---------|
|                                   | Total tested (%) | HCV antibody positive (proportion %) | p-value   | Total tested (%) | HCV antibody positive (proportion %) | p-value |
| <b>No</b>                         | 11,126           | 1,571                                |           | 26,047           | 1,456                                |         |
| <b>Sex</b>                        |                  |                                      |           |                  |                                      |         |
| Female                            | 6,052 (54.4)     | 711 (11.8)                           | <0.001    | 13,707 (52.6)    | 660 (4.8)                            | <0.001  |
| Male                              | 5,074 (45.6)     | 860 (17.0)                           |           | 12,340 (47.4)    | 796 (6.4)                            |         |
| <b>Age group (years)</b>          |                  |                                      |           |                  |                                      |         |
| 1-4                               | -                | -                                    | -         | 3,282 (12.6)     | 10 (0.3)                             |         |
| 5-9                               | -                | -                                    | -         | 3,601 (13.8)     | 10 (0.3)                             |         |
| 10-14                             | -                | -                                    | -         | 3,161 (12.1)     | 23 (0.7)                             |         |
| 15-19                             | 2,000 (18.0)     | 82 (4.1)                             | <0.001    | 2,568 (9.9)      | 30 (1.2)                             | <0.001  |
| 20-24                             | 1,837 (16.5)     | 91 (5.0)                             |           | 1,976 (7.6)      | 54 (2.7)                             |         |
| 25-29                             | 1,520 (13.7)     | 92 (6.1)                             |           | 2,358 (9.0)      | 88 (2.7)                             |         |
| 30-34                             | 1,244 (11.2)     | 133 (10.7)                           |           | 2,076 (8.0)      | 114 (5.5)                            |         |
| 35-39                             | 1,141 (10.3)     | 147 (12.9)                           |           | 1,853 (7.1)      | 130 (7.0)                            |         |
| 40-44                             | 1,069 (9.6)      | 238 (22.3)                           |           | 1,468 (5.6)      | 146 (10.0)                           |         |
| 45-49                             | 939 (8.4)        | 275 (29.3)                           |           | 1,380 (5.3)      | 208 (15.1)                           |         |
| 50-54                             | 728 (6.5)        | 272 (37.4)                           |           | 1,334 (5.1)      | 337 (25.3)                           |         |
| 55-59                             | 648 (5.8)        | 241 (37.2)                           | 990 (3.8) | 306 (30.9)       |                                      |         |
| <b>Type of place of residence</b> |                  |                                      |           |                  |                                      |         |
| Urban                             | 4,448 (40.0)     | 442 (9.9)                            | <0.001    | 11,955 (45.9)    | 546 (4.6)                            | <0.001  |
| Rural                             | 6,678 (60.0)     | 1,129 (16.9)                         |           | 14,092 (54.1)    | 910 (6.5)                            |         |

Abbreviations: EDHS, Egypt Demographic and Health Survey; HCV, Hepatitis C virus



**Table S2 STROBE checklist for cross-sectional studies**

|                           | <b>Item No</b> | <b>Recommendation</b>                                                                                                                                                                                                                                                                           | <b>Main Text Page No</b>                                                                                                                                                                |
|---------------------------|----------------|-------------------------------------------------------------------------------------------------------------------------------------------------------------------------------------------------------------------------------------------------------------------------------------------------|-----------------------------------------------------------------------------------------------------------------------------------------------------------------------------------------|
| <b>Title and abstract</b> | 1              | (a) Indicate the study's design with a commonly used term in the title or the abstract                                                                                                                                                                                                          | Abstract                                                                                                                                                                                |
|                           |                | (b) Provide in the abstract an informative and balanced summary of what was done and what was found                                                                                                                                                                                             | Abstract                                                                                                                                                                                |
| <b>Introduction</b>       |                |                                                                                                                                                                                                                                                                                                 |                                                                                                                                                                                         |
| Background/rationale      | 2              | Explain the scientific background and rationale for the investigation being reported                                                                                                                                                                                                            | Introduction                                                                                                                                                                            |
| Objectives                | 3              | State specific objectives, including any prespecified hypotheses                                                                                                                                                                                                                                | Introduction                                                                                                                                                                            |
| <b>Methods</b>            |                |                                                                                                                                                                                                                                                                                                 |                                                                                                                                                                                         |
| Study design              | 4              | Present key elements of study design early in the paper                                                                                                                                                                                                                                         | Methods ('Egypt Demographic and Health Surveys', 'Risk score derivation' & 'Performance and validation of the risk score')                                                              |
| Setting                   | 5              | Describe the setting, locations, and relevant dates, including periods of recruitment, exposure, follow-up, and data collection                                                                                                                                                                 | Methods ('Egypt Demographic and Health Surveys')                                                                                                                                        |
| Participants              | 6              | (a) Give the eligibility criteria, and the sources and methods of selection of participants                                                                                                                                                                                                     | Methods ('Egypt Demographic and Health Surveys')                                                                                                                                        |
| Variables                 | 7              | Clearly define all outcomes, exposures, predictors, potential confounders, and effect modifiers. Give diagnostic criteria, if applicable                                                                                                                                                        | Methods ('Egypt Demographic and Health Surveys', 'Risk score derivation' & 'Performance and validation of the risk score') & Table S1                                                   |
| Data sources/measurement  | 8              | For each variable of interest, give sources of data and details of methods of assessment (measurement). Describe comparability of assessment methods if there is more than one group                                                                                                            | Methods ('Egypt Demographic and Health Surveys', 'Risk score derivation' & 'Performance and validation of the risk score') & Table 1 & Table 3 & Tables S2-S3 & Figures 1-2 & Figure S2 |
| Bias                      | 9              | Describe any efforts to address potential sources of bias                                                                                                                                                                                                                                       | Methods ('Risk score derivation' & 'Performance and validation of the risk score') & Table 2 & Figures 1-2                                                                              |
| Study size                | 10             | Explain how the study size was arrived at                                                                                                                                                                                                                                                       | Not applicable, see Methods ('Egypt Demographic and Health Surveys')                                                                                                                    |
| Quantitative variables    | 11             | Explain how quantitative variables were handled in the analyses. If applicable, describe which groupings were chosen and why                                                                                                                                                                    | Methods ('Egypt Demographic and Health Surveys', 'Risk score derivation' & 'Performance and validation of the risk score') & Tables 1-3 & Table S3                                      |
| Statistical methods       | 12             | (a) Describe all statistical methods, including those used to control for confounding                                                                                                                                                                                                           | Methods ('Risk score derivation' & 'Performance and validation of the risk score')                                                                                                      |
|                           |                | (b) Describe any methods used to examine subgroups and interactions                                                                                                                                                                                                                             | Not applicable, see Methods ('Risk score derivation' & 'Performance and validation of the risk score')                                                                                  |
|                           |                | (c) Explain how missing data were addressed                                                                                                                                                                                                                                                     | Not applicable, see Methods ('Egypt Demographic and Health Surveys', 'Risk score derivation')                                                                                           |
|                           |                | (d) If applicable, describe analytical methods taking account of sampling strategy                                                                                                                                                                                                              | Not applicable                                                                                                                                                                          |
|                           |                | (e) Describe any sensitivity analyses                                                                                                                                                                                                                                                           | Not applicable                                                                                                                                                                          |
| <b>Results</b>            |                |                                                                                                                                                                                                                                                                                                 |                                                                                                                                                                                         |
| Participants              | 13             | (a) Report numbers of individuals at each stage of study—eg numbers potentially eligible, examined for eligibility, confirmed eligible, included in the study, completing follow-up, and analysed<br>(b) Give reasons for non-participation at each stage<br>(c) Consider use of a flow diagram | Table 1 & Tables S1 & Table S3                                                                                                                                                          |
| Descriptive data          | 14             | (a) Give characteristics of study participants (eg demographic, clinical, social) and information on exposures and potential confounders                                                                                                                                                        | Table 1 & Table S1 & Table S3 & Figure S1                                                                                                                                               |
|                           |                | (b) Indicate number of participants with missing data for each variable of interest                                                                                                                                                                                                             | Not applicable, see Methods ('Egypt Demographic and Health Surveys')                                                                                                                    |
| Outcome data              | 15             | Report numbers of outcome events or summary measures                                                                                                                                                                                                                                            | Results, Figures 1-2, Figure S1, Tables 1-3 & Table S1                                                                                                                                  |
| Main results              | 16             | (a) Give unadjusted estimates and, if applicable, confounder-adjusted estimates and their precision (eg, 95% confidence interval). Make clear which confounders were adjusted for and why they were included                                                                                    | Table 1 & Table S3                                                                                                                                                                      |

|                          |    |                                                                                                                                                                            |                                   |
|--------------------------|----|----------------------------------------------------------------------------------------------------------------------------------------------------------------------------|-----------------------------------|
|                          |    | (b) Report category boundaries when continuous variables were categorized                                                                                                  | Tables 1-3 & Table S1 & Table S3  |
|                          |    | © If relevant, consider translating estimates of relative risk into absolute risk for a meaningful time period                                                             | Tables 2-3 & Table S3 & Figure S1 |
| Other analyses           | 17 | Report other analyses done—eg analyses of subgroups and interactions, and sensitivity analyses                                                                             | Results & Table 2 & Figure 2      |
| <b>Discussion</b>        |    |                                                                                                                                                                            |                                   |
| Key results              | 18 | Summarise key results with reference to study objectives                                                                                                                   | Discussion, paragraphs 1-3        |
| Limitations              | 19 | Discuss limitations of the study, taking into account sources of potential bias or imprecision. Discuss both direction and magnitude of any potential bias                 | Discussion, paragraph 9           |
| Interpretation           | 20 | Give a cautious overall interpretation of results considering objectives, limitations, multiplicity of analyses, results from similar studies, and other relevant evidence | Discussion, paragraphs 4-6        |
| Generalisability         | 21 | Discuss the generalisability (external validity) of the study results                                                                                                      | Discussion, paragraphs 7-8        |
| <b>Other information</b> |    |                                                                                                                                                                            |                                   |
| Funding                  | 22 | Give the source of funding and the role of the funders for the present study and, if applicable, for the original study on which the present article is based              | Acknowledgements                  |

**Table S3** Results of univariable and multivariable regression analyses to derive the Egypt Hepatitis C Risk Score using data from EDHS 2008 and EDHS 2014

|                                   | EDHS 2008           |         |                     |         |      |              | EDHS 2014           |         |                     |         |      |              |
|-----------------------------------|---------------------|---------|---------------------|---------|------|--------------|---------------------|---------|---------------------|---------|------|--------------|
|                                   | OR* (95% CI)        | p-value | aOR** (95% CI)      | p-value | β‡   | Risk score § | OR* (95% CI)        | p-value | aOR** (95% CI)      | p-value | β‡   | Risk score § |
| <b>Sex</b>                        |                     |         |                     |         |      |              |                     |         |                     |         |      |              |
| Female                            | 1.00                |         | 1.00                |         | Ref  | 0            | 1.00                |         | 1.00                |         | Ref  | 0            |
| Male                              | 1.52 (1.35-1.70)    | <0.001  | 1.52 (1.34-1.73)    | <0.001  | 0.42 | 4            | 1.60 (1.41-1.83)    | <0.001  | 1.62 (1.40-1.87)    | <0.001  | 0.48 | 5            |
| <b>Age group (years)</b>          |                     |         |                     |         |      |              |                     |         |                     |         |      |              |
| 15-19                             | 1.00                |         | 1.00                |         |      | 0            | 1.00                |         | 1.00                |         |      | 0            |
| 20-24                             | 1.19 (0.86-1.64)    | 0.282   | 1.23 (0.89-1.69)    | 0.213   | 0.20 | 2            | 3.18 (1.82-5.58)    | <0.001  | 3.30 (1.88-5.81)    | <0.001  | 1.19 | 12           |
| 25-29                             | 1.52 (1.09-2.11)    | 0.014   | 1.60 (1.15-2.23)    | 0.005   | 0.47 | 5            | 4.38 (2.54-7.55)    | <0.001  | 4.50 (2.60-7.79)    | <0.001  | 1.51 | 15           |
| 30-34                             | 3.09 (2.27-4.21)    | <0.001  | 3.21 (2.35-4.39)    | <0.001  | 1.17 | 12           | 7.33 (4.29-12.49)   | <0.001  | 7.41 (4.35-12.65)   | <0.001  | 2.00 | 20           |
| 35-39                             | 3.69 (2.70-5.06)    | <0.001  | 3.89 (2.84-5.34)    | <0.001  | 1.36 | 14           | 8.56 (5.04-14.52)   | <0.001  | 8.74 (5.13-14.88)   | <0.001  | 2.17 | 22           |
| 40-44                             | 6.91 (5.15-9.26)    | <0.001  | 7.36 (5.47-9.90)    | <0.001  | 1.99 | 20           | 12.54 (7.51-20.95)  | <0.001  | 13.03 (7.79-21.81)  | <0.001  | 2.57 | 26           |
| 45-49                             | 9.30 (6.95-12.27)   | <0.001  | 10.34 (7.71-13.85)  | <0.001  | 2.34 | 23           | 18.64 (11.33-30.66) | <0.001  | 19.23 (11.66-31.69) | <0.001  | 2.96 | 30           |
| 50-54                             | 14.36 (10.78-19.13) | <0.001  | 16.43 (12.29-21.96) | <0.001  | 2.80 | 28           | 37.25 (22.75-60.98) | <0.001  | 41.11 (25.05-67.46) | <0.001  | 3.71 | 37           |
| 55-59                             | 15.09 (11.13-20.45) | <0.001  | 17.05 (12.50-23.26) | <0.001  | 2.84 | 28           | 49.26 (30.06-80.72) | <0.001  | 55.31 (33.59-91.06) | <0.001  | 4.01 | 40           |
| <b>Type of place of residence</b> |                     |         |                     |         |      |              |                     |         |                     |         |      |              |
| Urban                             | 1.00                |         | 1.00                |         | Ref  | 0            | 1.00                |         | 1.00                |         | Ref  | 0            |
| Rural                             | 1.91 (1.66-2.19)    | <0.001  | 2.34 (2.0-2.7)      | <0.001  | 0.85 | 9            | 1.73 (1.46-2.1)     | <0.001  | 2.15 (1.78-2.59)    | <0.001  | 0.76 | 8            |

Abbreviations: aOR, Adjusted odds ratio; CI, Confidence interval; EDHS, Egypt Demographic and Health Survey; HCV, Hepatitis C virus; OR, Odds ratio; Ref, Reference category.

\*The analysis applied the EDHS sampling weights.

†The odds ratio was adjusted for sex, age, and type of place of residence.

‡β-coefficients were based on the multivariable regression analysis.

§The risk score was calculated by multiplying the β coefficient by 10 and then rounding the result to the nearest integer.

# BMJ Open

## Hepatitis C Risk Score as a Tool to Identify Individuals with HCV Infection: A Demonstration and Cross-Sectional Epidemiological Study in Egypt

|                                 |                                                                                                                                                                                                                                                                                                                                                                                                                                                                                                                                                                                                                                                                                                                                                                                                                                                                                                                                                                                                                                                           |
|---------------------------------|-----------------------------------------------------------------------------------------------------------------------------------------------------------------------------------------------------------------------------------------------------------------------------------------------------------------------------------------------------------------------------------------------------------------------------------------------------------------------------------------------------------------------------------------------------------------------------------------------------------------------------------------------------------------------------------------------------------------------------------------------------------------------------------------------------------------------------------------------------------------------------------------------------------------------------------------------------------------------------------------------------------------------------------------------------------|
| Journal:                        | <i>BMJ Open</i>                                                                                                                                                                                                                                                                                                                                                                                                                                                                                                                                                                                                                                                                                                                                                                                                                                                                                                                                                                                                                                           |
| Manuscript ID                   | bmjopen-2024-085506.R1                                                                                                                                                                                                                                                                                                                                                                                                                                                                                                                                                                                                                                                                                                                                                                                                                                                                                                                                                                                                                                    |
| Article Type:                   | Original research                                                                                                                                                                                                                                                                                                                                                                                                                                                                                                                                                                                                                                                                                                                                                                                                                                                                                                                                                                                                                                         |
| Date Submitted by the Author:   | 02-Jun-2024                                                                                                                                                                                                                                                                                                                                                                                                                                                                                                                                                                                                                                                                                                                                                                                                                                                                                                                                                                                                                                               |
| Complete List of Authors:       | El-Khoury, Rayane; Weill Cornell Medicine - Qatar, Infectious Disease Epidemiology Group<br>Chemaitelly, Hiam; Weill Cornell Medicine - Qatar, Infectious Disease Epidemiology Group; Weill Cornell Medicine - Qatar, World Health Organization Collaborating Centre for Disease Epidemiology Analytics on HIV/AIDS, Sexually Transmitted Infections, and Viral Hepatitis<br>Alaama, Ahmed S.; World Health Organisation Regional Office for the Eastern Mediterranean, Department of Communicable Diseases<br>Hermez, Joumana G.; World Health Organisation Regional Office for the Eastern Mediterranean, Department of Communicable Diseases<br>Nagelkerke, Nico; Weill Cornell Medicine - Qatar, Infectious Disease Epidemiology Group<br>Abu-Raddad, Laith; Weill Cornell Medicine - Qatar, Infectious Disease Epidemiology Group, Weill Cornell Medicine-Qatar; Weill Cornell Medicine - Qatar, World Health Organization Collaborating Centre for Disease Epidemiology Analytics on HIV/AIDS, Sexually Transmitted Infections, and Viral Hepatitis |
| <b>Primary Subject Heading</b>: | Epidemiology                                                                                                                                                                                                                                                                                                                                                                                                                                                                                                                                                                                                                                                                                                                                                                                                                                                                                                                                                                                                                                              |
| Secondary Subject Heading:      | Infectious diseases                                                                                                                                                                                                                                                                                                                                                                                                                                                                                                                                                                                                                                                                                                                                                                                                                                                                                                                                                                                                                                       |
| Keywords:                       | EPIDEMIOLOGY, Risk Factors, Public health < INFECTIOUS DISEASES                                                                                                                                                                                                                                                                                                                                                                                                                                                                                                                                                                                                                                                                                                                                                                                                                                                                                                                                                                                           |
|                                 |                                                                                                                                                                                                                                                                                                                                                                                                                                                                                                                                                                                                                                                                                                                                                                                                                                                                                                                                                                                                                                                           |

SCHOLARONE™  
Manuscripts



I, the Submitting Author has the right to grant and does grant on behalf of all authors of the Work (as defined in the below author licence), an exclusive licence and/or a non-exclusive licence for contributions from authors who are: i) UK Crown employees; ii) where BMJ has agreed a CC-BY licence shall apply, and/or iii) in accordance with the terms applicable for US Federal Government officers or employees acting as part of their official duties; on a worldwide, perpetual, irrevocable, royalty-free basis to BMJ Publishing Group Ltd ("BMJ") its licensees and where the relevant Journal is co-owned by BMJ to the co-owners of the Journal, to publish the Work in this journal and any other BMJ products and to exploit all rights, as set out in our [licence](#).

The Submitting Author accepts and understands that any supply made under these terms is made by BMJ to the Submitting Author unless you are acting as an employee on behalf of your employer or a postgraduate student of an affiliated institution which is paying any applicable article publishing charge ("APC") for Open Access articles. Where the Submitting Author wishes to make the Work available on an Open Access basis (and intends to pay the relevant APC), the terms of reuse of such Open Access shall be governed by a Creative Commons licence – details of these licences and which [Creative Commons](#) licence will apply to this Work are set out in our licence referred to above.

Other than as permitted in any relevant BMJ Author's Self Archiving Policies, I confirm this Work has not been accepted for publication elsewhere, is not being considered for publication elsewhere and does not duplicate material already published. I confirm all authors consent to publication of this Work and authorise the granting of this licence.

## ORIGINAL RESEARCH

**Hepatitis C Risk Score as a Tool to Identify Individuals with HCV Infection: A Demonstration and Cross-Sectional Epidemiological Study in Egypt**

Rayane El-Khoury<sup>1,2</sup>, Hiam Chemaitelly<sup>1,2,3</sup>, Ahmed S. Alaama<sup>4</sup>, Joumana G. Hermez<sup>4</sup>, and Nico Nagelkerke<sup>1</sup>, Laith J. Abu-Raddad<sup>1,2,3,5,6\*</sup>

<sup>1</sup>*Infectious Disease Epidemiology Group, Weill Cornell Medicine-Qatar, Cornell University, Qatar Foundation - Education City, Doha, Qatar*

<sup>2</sup>*World Health Organization Collaborating Centre for Disease Epidemiology Analytics on HIV/AIDS, Sexually Transmitted Infections, and Viral Hepatitis, Weill Cornell Medicine-Qatar, Cornell University, Qatar Foundation – Education City, Doha, Qatar*

<sup>3</sup>*Department of Population Health Sciences, Weill Cornell Medicine, Cornell University, New York, New York, USA*

<sup>4</sup>*Department of Communicable Diseases, HIV/Hepatitis/STIs Unit, World Health Organization Regional Office for the Eastern Mediterranean, Cairo, Egypt*

<sup>5</sup>*Department of Public Health, College of Health Sciences, Member of QU Health, Qatar University, Doha, Qatar*

<sup>6</sup>*College of Health and Life Sciences, Hamad bin Khalifa University, Doha, Qatar*

**Word count:** Abstract: 279 words, Main text: 3,388 words.

**Number of tables:** 3.

**Number of figures:** 3.

**Running head:** Hepatitis C virus risk score in Egypt.

**Funding:** The Qatar National Research Fund (NPRP 12S-0216-190094).

**\*Correspondence to:** Professor Laith J. Abu-Raddad, Infectious Disease Epidemiology Group, World Health Organization Collaborating Centre for Disease Epidemiology Analytics on HIV/AIDS, Sexually Transmitted Infections, and Viral Hepatitis, Weill Cornell Medicine - Qatar, Qatar Foundation - Education City, P.O. Box 24144, Doha, Qatar. Telephone: +(974) 4492-8321. Fax: +(974) 4492-8333. E-mail: [lja2002@qatar-med.cornell.edu](mailto:lja2002@qatar-med.cornell.edu).

## ABSTRACT

**Objectives:** Hepatitis C virus (HCV) infection poses a global health challenge. By the end of 2021, the World Health Organization estimated that less than a quarter of global HCV infections had been diagnosed. There is a need for a public health tool that can facilitate the identification of people with HCV infection and link them to testing and treatment, and that can be customized for each country.

**Methods:** We derived and validated a risk score to identify people with HCV in Egypt and demonstrated its utility. Utilizing data from the 2008 and 2014 Egypt Demographic and Health Surveys, two risk scores were constructed through multivariable logistic regression analysis. A range of diagnostic metrics was then calculated to evaluate the performance of these scores.

**Results:** The 2008 and 2014 risk scores exhibited similar dependencies on sex, age, and type of place of residence. Both risk scores demonstrated high and similar areas under the curve of 0.77 (95% CI: 0.76-0.78) and 0.78 (95% CI: 0.77-0.80), respectively. For the 2008 Risk Score, sensitivity was 73.7% (95% CI: 71.5-75.9%), specificity was 68.5% (95% CI: 67.5-69.4%), positive predictive value (PPV) was 27.8% (95% CI: 26.4-29.2%), and negative predictive value (NPV) was 94.1% (95% CI: 93.5-94.6%). For the 2014 Risk Score, sensitivity was 64.0% (95% CI: 61.5-66.6%), specificity was 78.2% (95% CI: 77.5-78.9%), PPV was 22.2% (95% CI: 20.9-23.5%), and NPV was 95.7% (95% CI: 95.4-96.1%). Each score was validated by applying it to a different survey database than the one used to derive it.

**Conclusions:** Implementation of HCV risk scores is an effective strategy to identify carriers of HCV infection and to link them to testing and treatment at low cost to national programs.

**Keywords:** Hepatitis C virus, viral hepatitis, risk score, Egypt, Demographic Health Survey.

**Strengths and limitations of this study:**

- This study derived a risk score that provides a non-invasive and easily administered method to identify hepatitis C virus carriers and link them to treatment and care.
- The risk score was based on and validated using two rounds of population-based, high-quality national surveys in Egypt.
- The derivation of the risk score used only a few variables and thus may not adequately capture the complex epidemiology of hepatitis C virus infection.
- The derived risk score is specific to Egypt and may not be applicable to populations in other countries.



## INTRODUCTION

Hepatitis C virus (HCV) infection is a global public health challenge[1, 2] and a major cause of morbidity and mortality, resulting in liver cancer, fibrosis, and cirrhosis[3]. By end of 2021, the World Health Organization (WHO) estimated that 58 million people were infected with HCV, but only 15 million of them were diagnosed and only 9 million received treatment[4]. Direct-acting antivirals (DAA) offer highly effective treatment to cure this infection and to prevent progression toward severe forms of liver disease[5], as well as an opportunity to reduce HCV transmission through treatment as prevention[6, 7]. Accordingly, the WHO has set a global target to eliminate HCV infection as a public health problem by 2030[2, 8].

While DAAs are becoming accessible globally, it has been challenging to identify carriers of this infection so as to treat them, especially in the Middle East and North Africa (MENA), the region most affected by HCV infection and where most people with HCV infection remain undiagnosed[9, 10]. Limited resources have made it challenging for viral hepatitis programs to find low-cost and cost-effective approaches to identify people with HCV. While mass testing and treatment programs may be relevant in high prevalence countries, other countries have relatively low HCV prevalence making such programs less cost-effective[10-16]. While low-cost point-of-care tests (POCs) have been beneficial in some countries, such as Egypt[17], they remain relatively expensive for countries like Pakistan, which bear a substantial share of the global burden[18-20]. There is a need for a public health tool that can assist in identifying persons potentially living with HCV, to link them to testing and treatment.

One such tool is the use of risk scores to identify individuals potentially living with HCV. A risk score comprises a small set of simple questions that can be used to assess the likelihood that an individual has a specific health condition[21-24], in this case, HCV infection. Such risk scores

1  
2  
3 have proven influential as public health tools for a range of health conditions, such as  
4  
5 diabetes[21-24].  
6  
7

8 In this study, we demonstrate the application of this public health tool for HCV infection in  
9  
10 Egypt, aiming to illustrate the public health value and practical utility of developing HCV risk  
11  
12 scores in various countries. The risk score derived here is not intended for universal application  
13  
14 across diverse settings; it is specifically designed for Egypt. However, the concept and analytical  
15  
16 approach can be adapted to other countries by considering the local HCV epidemiology to  
17  
18 determine the relevant factors and their respective weights for inclusion in a score tailored to  
19  
20 each specific context.  
21  
22  
23

## 24 **METHODS**

### 25 *Egypt Demographic and Health Surveys*

26  
27  
28 The Egypt Demographic and Health Survey (EDHS) is a national survey that collected data  
29  
30 pertaining to the health and demographics of a nationally representative sample of the resident  
31  
32 population of Egypt, including HCV infection[25, 26]. The EDHS that included HCV  
33  
34 biomarkers was conducted in 2008 and 2014 and used rigorous sampling methods[27]. Details  
35  
36 on study design, data collection, and laboratory methods can be found in El-Zanaty et al.[25, 26].  
37  
38 HCV antibody testing was done using a third generation enzyme-linked immunosorbent assay  
39  
40 (ELISA), the Enzyme Immunoassay Adlatis EIAgen HCV Ab test (Adaltis Inc., Montreal,  
41  
42 Canada)[25, 26]. All samples that were positive in the ELISA assay and 5% of the negative  
43  
44 samples were then retested using a more specific assay, the chemiluminescent microplate  
45  
46 immunoassay (CMIA ARCHITECT plus i1000SR, Abbott Diagnostic, USA)[25, 26]. If a  
47  
48 sample was positive in both the ELISA and the CMIA testing, it was also tested for current  
49  
50  
51  
52  
53  
54  
55  
56  
57  
58  
59  
60

1  
2  
3 active infection, using real-time, reverse-transcription polymerase chain reaction (RT-qPCR)  
4 testing to detect HCV ribonucleic acid (RNA)[25, 26]. Samples were further retested for internal  
5 and external quality assurance[25, 26]. Here we restrict our analyses to the HCV antibody  
6 results.  
7  
8  
9  
10

11  
12 Data from the EDHS 2008 and EDHS 2014 were downloaded with permission from Measure  
13 DHS[28]. The data can be accessed through application to the DHS Program at  
14 <https://dhsprogram.com>. For purposes of this study, the EDHS individual database was merged  
15 with the HCV biomarker database, based on established guidelines for managing DHS data[27].  
16 All individuals with results for HCV antibody testing were included in the analysis.  
17  
18  
19  
20  
21  
22  
23  
24

### 25 ***Patient and Public Involvement***

26  
27 None.  
28  
29

### 30 ***Risk score derivation***

31  
32 Associations of HCV antibody positivity (seropositivity) with a priori variables that are easy to  
33 evaluate in a primary healthcare setting, and that can be included in a risk score, were  
34 investigated. These variables included sex (male versus female), age (5-year age strata), and type  
35 of place of residence (urban versus rural). Frequency distributions were generated to describe  
36 demographic and clinical profiles of tested individuals.  
37  
38  
39  
40  
41  
42  
43  
44

45 Chi-square tests and univariable logistic regression were implemented to investigate  
46 associations. Participants younger than 15 years of age were excluded as this age group was not  
47 included in the EDHS 2008 and has low HCV prevalence (Table S1)[6, 29-31]. Odds ratios  
48 (ORs), 95% confidence intervals (CIs), and p-values were reported. Covariates with p-values  
49  $\leq 0.1$  in univariable regression analysis were considered possibly associated with HCV  
50  
51  
52  
53  
54  
55  
56  
57  
58  
59  
60

1  
2  
3 seropositivity. These were included in the multivariable analysis for estimation of adjusted ORs  
4 (AORs) and associated 95% CIs and p-values. No other forward or backward elimination for  
5 variable selection was used. Covariates with p-values  $\leq 0.05$  in the multivariable model were  
6 considered predictors of HCV seropositivity. Univariable and multivariable analyses were  
7 adjusted for sampling weights.

8  
9  
10 A risk score was constructed based on the  $\beta$ -coefficients obtained from the multivariable  
11 regression model.  $\beta$ -coefficients were multiplied by a factor of 10 and then rounded to the  
12 nearest integer. The total risk score was calculated by adding the individual scores. To keep the  
13 score simple enough for use in primary healthcare and other general population settings, we did  
14 not consider any interaction terms.

### 15 16 17 ***Performance and validation of the risk score***

18  
19  
20 A receiver operating characteristics (ROC) curve was plotted to investigate the performance of  
21 the risk score in predicting HCV seropositivity at different score cut-offs. A larger area under the  
22 curve (AUC), also called the c-index, indicates better performance of the risk score. The cut-off  
23 for the score was determined by maximizing the sum of the sensitivity and specificity.

24  
25  
26 Sensitivity is the probability that the risk score will yield a positive diagnosis in a subject who is  
27 truly HCV antibody-positive. Specificity is the probability that the risk score will yield a  
28 negative diagnosis in a subject who is truly HCV antibody-negative.

29  
30  
31 Performance of the risk score was also investigated by estimating the positive predictive value  
32 (PPV) and the negative predictive value (NPV) of the risk score. PPV is the probability that a  
33 subject with a positive diagnosis per the risk score is truly HCV antibody-positive. NPV is the  
34 probability that a subject with a negative diagnosis per the risk score is truly HCV antibody-  
35 negative. The proportion of subjects who have scores greater than or equal to the cut-off of the  
36  
37  
38  
39  
40  
41  
42  
43  
44  
45  
46  
47  
48  
49  
50  
51  
52  
53  
54  
55  
56  
57  
58  
59  
60

1  
2  
3 risk score was estimated to determine the proportion of individuals that need to be biochemically  
4 tested for HCV antibodies.  
5  
6

7  
8 To validate the performance of the EDHS 2008 risk score, it was applied to the EDHS 2014 data,  
9 providing an independent validation with a dataset different from the one used for its derivation.  
10 Performance diagnostics were subsequently assessed. Given the pronounced cohort effect in the  
11 epidemiology of HCV infection in Egypt[6, 29-31], the age variable was adjusted to reflect the  
12 6-year interval between the surveys. For example, individuals who were 11 years old in 2008  
13 would have been 17 years old at the time of the second survey in 2014. The same approach was  
14 also used to validate the EDHS 2014 risk score—it was applied to the EDHS 2008 database and  
15 performance diagnostics were assessed.  
16  
17  
18  
19  
20  
21  
22  
23  
24  
25

26  
27 While the cut-off for the score was determined by maximizing the sum of sensitivity and  
28 specificity, this cut-off can be adjusted as needed from a programmatic standpoint to optimize a  
29 specific diagnostic metric, such as sensitivity instead of specificity. To illustrate this flexibility,  
30 an additional analysis was incorporated featuring a variety of score cut-offs, resulting in diverse  
31 values of sensitivity, specificity, PPV, and NPV. Such additional analysis enables program  
32 managers and readers to discern the trade-offs among these diagnostic metrics and observe the  
33 implications of selecting an alternative programmatic approach, such as prioritizing the  
34 optimization of sensitivity over specificity.  
35  
36  
37  
38  
39  
40  
41  
42  
43  
44  
45

46 Analyses were conducted in Stata version 16.1 (Stata Corporation, College Station, TX, USA).  
47 The study was reported following the Strengthening the Reporting of Observational Studies in  
48 Epidemiology (STROBE) guidelines (Table S2).  
49  
50  
51

## 52 53 **RESULTS**

54  
55  
56  
57  
58  
59  
60

1  
2  
3 In the 2008 EDHS, 11,126 individuals 15-59 years of age were tested, of whom 1,571 were  
4 antibody-positive[25]. The 2014 EDHS included children 1-14 years of age in addition to adults  
5 15-59 years of age[26]. In this latter survey, 26,047 individuals were tested of whom 1,456 were  
6 antibody-positive[26].  
7  
8  
9

10  
11  
12  
13 Characteristics of individuals who were tested for HCV antibodies and the proportion of each  
14 population stratum that was HCV antibody-positive are shown in Table S1 for both of the EDHS  
15 surveys. Results of both surveys were consistent, taking into account the age shift in the national  
16 cohort with the passage of 6 years between the EDHS 2008 and EDHS 2014.  
17  
18  
19

20  
21  
22 HCV seropositivity was strongly associated with sex, age, and place of residence in both national  
23 surveys (Table 1 and Table S3). Male sex and rural residence were associated with higher  
24 seropositivity. Seropositivity increased rapidly with age.  
25  
26  
27  
28  
29

30  
31 The 2008 and 2014 Egypt Hepatitis C Risk Scores derived using the EDHS 2008 and EDHS  
32 2014 data, respectively, are shown in Figure 1. The 2008 Risk Score had a range of 0-41. The  
33 2014 Risk Score had a range of 0-53. Both showed similar dependence on sex, age, and type of  
34 place of residence. Both demonstrated high and similar AUCs (Figure 2). The AUC was 0.77  
35 (95% CI: 0.76-0.78) for the 2008 Risk Score and 0.78 (95% CI: 0.77-0.80) for the 2014 Risk  
36 Score. The highest sum of sensitivity and specificity was obtained at a score cut-off value of 22  
37 for the 2008 Risk Score and at a cut-off of 34.5 for the 2014 Risk Score.  
38  
39  
40  
41  
42  
43  
44  
45

46  
47 For the 2008 Risk Score, sensitivity was 73.7% (95% CI: 71.5-75.9%), specificity was 68.5%  
48 (95% CI: 67.5-69.4%), PPV was 27.8% (95% CI: 26.4-29.2%), and NPV was 94.1% (95% CI:  
49 93.5-94.6%) (Table 2). For the 2014 Risk Score, sensitivity was 64.0% (95% CI: 61.5-66.6%),  
50 specificity was 78.2% (95% CI: 77.5-78.9%), PPV was 22.2% (95% CI: 20.9-23.5%), and NPV  
51 was 95.7% (95% CI: 95.4-96.1%). The proportion of the population 15-59 years of age that  
52  
53  
54  
55  
56  
57  
58  
59

1  
2  
3 needed to be biochemically tested for HCV antibodies was 37.2% (95% CI: 36.3-38.1%) using  
4 the 2008 Risk Score and 25.5% (95% CI: 24.9-26.2%) using the 2014 Risk Score. Of all people  
5  
6 with HCV in the EDHS samples, application of this score would have diagnosed (that is  
7  
8 identified; sensitivity) 73.7% (95% CI: 71.5-75.9%) and 64.0% (95% CI: 61.5-66.6%) of all  
9  
10 these persons in samples of the EDHS 2008 and 2014, respectively.  
11  
12  
13  
14

15 When the 2008 Risk Score was applied to the EDHS 2014 data, the AUC was 0.75 (95% CI:  
16  
17 0.74-0.77), the sensitivity was 66.1% (95% CI: 63.5-68.6%), and the specificity was 72.3% (95%  
18  
19 CI: 71.5-73.1%) (Table 2). These performance indicators were similar to the original  
20  
21 performance indicators generated using the EDHS 2008 data, as well as to the performance  
22  
23 indicators of the 2014 Risk Score on the EDHS 2014 data. Therefore, this application validates  
24  
25 this risk score. A similar outcome was found when the 2014 Risk Score was applied to the EDHS  
26  
27 2008 data, also providing a validation of the 2014 risk score.  
28  
29  
30

31  
32 Figure 3 displays the proportion of HCV infections in the population that are diagnosed as a  
33  
34 function of the proportion of the population that needs to be tested to identify these infections,  
35  
36 using each of EDHS 2008 and EDHS 2014 data. The figure shows the effect of prioritization of  
37  
38 testing for those with higher to lower risk score. This provides a demonstration of the utility of  
39  
40 using the risk score: a large proportion of HCV infections can be diagnosed by testing only a  
41  
42 small proportion of the population. It is most efficient programmatically to start testing  
43  
44 individuals with the highest risk score and progressively moving on to those with lower and  
45  
46 lower risk scores. As testing is expanded to those with low risk scores, the yield in identifying  
47  
48 more HCV infections is very limited.  
49  
50  
51

52  
53 Table 3 illustrates the implications of selecting various score cut-offs, providing insight into the  
54  
55 trade-offs among different diagnostic metrics, as well as the proportion of the population  
56  
57  
58  
59  
60

1  
2  
3 requiring biochemical testing and the proportion of all individuals with HCV identified through  
4 the application of this score. For instance, by enhancing the specificity of the risk score, the PPV  
5 increases, and the proportion of the population necessitating testing decreases. This reduction in  
6 testing requirements helps alleviate costs and streamline the logistics of the test-and-treat  
7 program. However, this enhanced program efficiency comes at the expense of lower NPV and  
8 sensitivity, implying a smaller proportion of individuals with HCV in the population being  
9 identified through the risk score.  
10  
11  
12  
13  
14  
15  
16  
17  
18

## 19 **DISCUSSION**

20  
21 We demonstrated that a risk score that consists of few simple questions that are easy to evaluate  
22 in a primary healthcare setting or implemented through a website or an app that helps persons  
23 identify their risk of being HCV infected, provides an effective and non-invasive public health  
24 tool to identify carriers of HCV infection and to link them to testing and treatment. Biochemical  
25 testing methods to identify people with HCV are invasive and time-consuming and require  
26 human and financial resources, as well as complex logistics, making them less scalable,  
27 particularly in resource-limited settings. In contrast, initial screening using a risk score can be  
28 easily administered or self-administered, is non-invasive, and requires minimal resources and  
29 logistics. Therefore, HCV risk scores can be an indispensable strategy for the global response to  
30 attain the target of HCV elimination as a public health problem by 2030.  
31  
32  
33  
34  
35  
36  
37  
38  
39  
40  
41  
42  
43  
44  
45

46 While the concept of a risk score shares similarities with risk-based testing, which has been  
47 implemented in some countries, predominantly in higher-income nations[32-34], the risk score  
48 approach transcends mere risk-based testing. It enables a broader application across various  
49 settings and situations and can significantly contribute to raising awareness of the infection  
50 among the general population. The risk score approach represents a tool that addresses several  
51  
52  
53  
54  
55  
56  
57  
58  
59  
60



1  
2  
3 public health needs simultaneously, extending the application of risk-based testing beyond  
4 conventional healthcare settings. Moreover, it entails minimal costs and logistics, making it  
5  
6 feasible even in resource-limited settings.  
7  
8  
9

10 Remarkably, the risk score, comprising three simple questions, demonstrated considerable  
11 diagnostic accuracy, as evidenced by the values of various diagnostic metrics, including AUC,  
12 sensitivity, specificity, PPV, and NPV. Of particular note is the high NPV, ensuring that a  
13 negative result is highly unlikely to be a false negative, thereby obviating the need for  
14  
15 individuals with a negative outcome using the score to undergo testing for HCV antibodies. The  
16 score also identified 73.7% and 64.0% of all HCV infections in the EDHS 2008 and EDHS 2014  
17 samples, respectively. Thus, the score fulfills its objective of facilitating the efficient  
18  
19 identification of individuals with HCV infection while minimizing the necessity for conducting  
20 biochemical testing. This underscores the value of this approach in identifying as many people  
21 with HCV as early as possible and initiating treatment before progression to serious clinical  
22 disease.  
23  
24  
25  
26  
27  
28  
29  
30  
31  
32  
33  
34  
35

36 This approach was demonstrated for Egypt, considering the availability of two EDHS surveys to  
37 derive and validate the score. The two scores exhibited comparable structures and diagnostic  
38 performances, with minor differences attributed to sampling variation of the same population  
39 across two distinct rounds of the EDHS surveys. Each score was validated by applying it to a  
40 database other than the one used to derive it. The latter application yielded a diagnostic  
41 performance that was comparable to the original diagnostic performance against the database  
42 used to originate it. This highlights how a single national survey for HCV infection may be  
43 sufficient to develop an effective risk score for this infection, and that can become an integral  
44 component of the national response to eliminate HCV infection.  
45  
46  
47  
48  
49  
50  
51  
52  
53  
54  
55  
56  
57  
58  
59  
60

1  
2  
3 The approach demonstrated in this study can be applied in other countries, including those in the  
4 MENA region. In countries where nationally representative population-based surveys have been  
5 conducted, these surveys can serve as the basis for deriving the risk score, as was done in this  
6 study. However, only three MENA countries—Egypt, Libya, and Pakistan—have conducted  
7 such surveys[25, 26, 35, 36]. For countries where such surveys are not available[10-16], the risk  
8 score can still be derived using data from available regional surveys. Alternatively, if regional  
9 surveys are not available, the effects of risk factors for infection can be pooled, either in terms of  
10 odds ratios or relative risks, using data from analytical studies[37]. These effects can also be  
11 derived from meta-regression analyses applied to all available HCV prevalence studies for each  
12 country[38-45].

13  
14  
15 While this study focused on demonstrating the utility of this concept as a public health tool,  
16 actual application of this approach to different countries can be enhanced for even higher  
17 diagnostic accuracy. One extension could be adding more variables to the score in a manner  
18 tailored to the local epidemiology of each country. For instance, province or city of birth and/or  
19 current residence, prior exposure to an HCV mode of transmission[37], or history of HCV  
20 infection in the family, could be added, among others. Given that the risk of exposure to HCV  
21 infection varies immensely by at-risk population type and shows a distinctive hierarchy[46], an  
22 additional component to the score could be to integrate the at-risk population type as a  
23 variable[41, 46], thereby further enhancing the diagnostic accuracy of the score. Testing  
24 strategies, therefore, could be highly efficient in identifying people with HCV at a modest cost.

25  
26  
27 However, caution must be exercised to prevent the creation of stigma associated with HCV  
28 infection or the use of an HCV risk score. For instance, it may not be feasible to include  
29 questions about stigmatized behaviors in the MENA context, such as injecting drug use or

1  
2  
3 specific sexual practices, when the score is applied in general population settings like primary  
4 healthcare. However, such questions may be appropriate in other settings, such as voluntary  
5 counseling and testing (VCT) centers or outreach efforts by community organizations working  
6 with the most at-risk populations[47]. It is important also for the risk score to factor community  
7 acceptance in its design and implementation, ensuring it addresses the specific needs of certain  
8 groups, such as women of childbearing age in contexts where the risk of HCV vertical  
9 transmission is not negligible[48-50].

10  
11  
12 The application of HCV risk scores can be influenced by programmatic considerations and  
13 variations in context. This may necessitate prioritizing specific diagnostic metrics, such as  
14 sensitivity over specificity. The approach presented here demonstrates an inherent flexibility of  
15 the score, allowing adjustments to address specific programmatic needs, as illustrated by the  
16 analysis using different cut-off points (Table 3). However, it is critical to acknowledge the  
17 inherent trade-offs between diagnostic metrics. Optimizing one metric, such as sensitivity, will  
18 inevitably impact others, like specificity. Therefore, careful consideration is essential to align the  
19 score's cut-off with the specific programmatic context and its corresponding needs.

20  
21  
22 This study has limitations. For ease of use in primary healthcare and more broadly by the public,  
23 a risk score has to be simple. Accordingly, it cannot fully represent the complex epidemiology of  
24 HCV infection, such as interactions among risk factors. This risk score was derived for Egypt,  
25 which may not benefit from this risk score, given that this country has opted for mass testing of  
26 its entire population[17]. Derivation of a risk score typically requires at least one round of a  
27 population-based survey, ideally at the national level, but many countries may not have such  
28 survey data to be able to easily derive a risk score. The risk score was derived for a high-burden  
29 country, and utility of this approach still needs to be demonstrated for countries with low HCV

1  
2  
3 prevalence. Nonetheless, this approach may prove to have higher utility in countries with low  
4  
5 HCV prevalence than in countries with high HCV prevalence, as HCV epidemiology shows a  
6  
7 clearer hierarchy in infection exposure risk in countries with concentrated HCV epidemics  
8  
9 compared to those with generalized HCV epidemics[46].  
10  
11

## 12 **Conclusions**

13  
14  
15 An HCV risk score can be derived using only one round of a population-based survey and offers  
16  
17 an effective, simple, non-invasive strategy to identify carriers of HCV infection and to link them  
18  
19 to testing and treatment, at low cost. This public health tool can be implemented and used for  
20  
21 prioritizing populations for interventions with minimal logistical complexity and cost, especially  
22  
23 in resource-limited countries.  
24  
25  
26  
27  
28  
29  
30  
31  
32  
33  
34  
35  
36  
37  
38  
39  
40  
41  
42  
43  
44  
45  
46  
47  
48  
49  
50  
51  
52  
53  
54  
55  
56  
57  
58  
59  
60

1  
2  
3 **Acknowledgements** The authors are grateful for the administrative support of Ms. Adona  
4  
5 Canlas.  
6

7  
8 **Ethics approval** The study used anonymized publicly available data accessed through the  
9  
10 Demographic and Health Survey program; therefore, ethical approval or collection of informed  
11  
12 consent was not required.  
13

14  
15 **Contributors** REK conducted the data analyses with HC and NN. REK, NN, and LJA co-wrote  
16  
17 the first draft of the article. LJA conceived and led the design of the study, analyses, and drafting  
18  
19 the article. All authors contributed to drafting and revising the manuscript. All authors have read  
20  
21 and approved the final manuscript.  
22

23  
24 **Funding** This work was supported by the National Priorities Research Program (NPRP) [grant  
25  
26 number 12S-0216-190094] from the Qatar National Research Fund (a member of Qatar  
27  
28 Foundation). The statements made herein are solely the responsibility of the authors. The authors  
29  
30 are also grateful for infrastructure support provided by the Biostatistics, Epidemiology, and  
31  
32 Biomathematics Research Core at Weill Cornell Medicine-Qatar.  
33

34  
35  
36 **Competing interests** None declared.  
37

38  
39 **Patient consent for publication** Not required.  
40

41  
42 **Data availability statement** All data analyzed in this study can be accessed through application  
43  
44 to the DHS Program at <https://dhsprogram.com/> or by contacting [archive@dhsprogram.com](mailto:archive@dhsprogram.com).  
45  
46  
47  
48  
49  
50  
51  
52  
53  
54  
55  
56  
57  
58  
59  
60

1  
2  
3 **Figure 1.** Mathematical formula of the derived Egypt Hepatitis C Risk Score. A) Egypt  
4 Hepatitis C Risk Score using the EDHS 2008. B) Egypt Hepatitis C Risk Score using the EDHS  
5 2014.  
6

7 **Figure 2.** Diagnostic performance of the Egypt Hepatitis C Risk Score using the area under the  
8 (ROC) curve. A) Using the EDHS 2008 data. B) Using the EDHS 2014 data.  
9

10 **Figure 3.** Proportion of HCV infections in the population that are diagnosed as a function of the  
11 proportion of the population that needs to be tested to identify these infections. The figure shows  
12 the effect of prioritization of testing for those with higher to lower risk score. A) Using the  
13 EDHS 2008 data. B) Using the EDHS 2014 data.  
14  
15  
16  
17  
18  
19  
20  
21  
22  
23  
24  
25  
26  
27  
28  
29  
30  
31  
32  
33  
34  
35  
36  
37  
38  
39  
40  
41  
42  
43  
44  
45  
46  
47  
48  
49  
50  
51  
52  
53  
54  
55  
56  
57  
58  
59  
60

**Table 1** Results of the multivariable regression analyses to derive the Egypt Hepatitis C Risk Score using data from EDHS 2008 and EDHS 2014

|                                   | EDHS 2008                  |         |                |                         | EDHS 2014                  |         |                |                         |
|-----------------------------------|----------------------------|---------|----------------|-------------------------|----------------------------|---------|----------------|-------------------------|
|                                   | aOR <sup>††</sup> (95% CI) | p-value | β <sup>‡</sup> | Risk score <sup>§</sup> | aOR <sup>††</sup> (95% CI) | p-value | β <sup>‡</sup> | Risk score <sup>§</sup> |
| <b>Sex</b>                        |                            |         |                |                         |                            |         |                |                         |
| Female                            | 1.00                       |         | Ref            | 0                       | 1.00                       |         | Ref            | 0                       |
| Male                              | 1.52 (1.34-1.73)           | <0.001  | 0.42           | 4                       | 1.62 (1.40-1.87)           | <0.001  | 0.48           | 5                       |
| <b>Age group (years)</b>          |                            |         |                |                         |                            |         |                |                         |
| 15-19                             | 1.00                       |         |                | 0                       | 1.00                       |         |                |                         |
| 20-24                             | 1.23 (0.89-1.69)           | 0.213   | 0.20           | 2                       | 3.30 (1.88-5.81)           | <0.001  | 1.19           | 12                      |
| 25-29                             | 1.60 (1.15-2.23)           | 0.005   | 0.47           | 5                       | 4.50 (2.60-7.79)           | <0.001  | 1.51           | 15                      |
| 30-34                             | 3.21 (2.35-4.39)           | <0.001  | 1.17           | 12                      | 7.41 (4.35-12.65)          | <0.001  | 2.00           | 20                      |
| 35-39                             | 3.89 (2.84-5.34)           | <0.001  | 1.36           | 14                      | 8.74 (5.13-14.88)          | <0.001  | 2.17           | 22                      |
| 40-44                             | 7.36 (5.47-9.90)           | <0.001  | 1.99           | 20                      | 13.03 (7.79-21.81)         | <0.001  | 2.57           | 26                      |
| 45-49                             | 10.34 (7.71-13.85)         | <0.001  | 2.34           | 23                      | 19.23 (11.66-31.69)        | <0.001  | 2.96           | 30                      |
| 50-54                             | 16.43 (12.29-21.96)        | <0.001  | 2.80           | 28                      | 41.11 (25.05-67.46)        | <0.001  | 3.71           | 37                      |
| 55-59                             | 17.05 (12.50-23.26)        | <0.001  | 2.84           | 28                      | 55.31 (33.59-91.06)        | <0.001  | 4.01           | 40                      |
| <b>Type of place of residence</b> |                            |         |                |                         |                            |         |                |                         |
| Urban                             | 1.00                       |         | Ref            | 0                       | 1.00                       |         | Ref            | 0                       |
| Rural                             | 2.34 (2.0-2.7)             | <0.001  | 0.85           | 9                       | 2.15 (1.78-2.59)           | <0.001  | 0.76           | 8                       |

Abbreviations: aOR, Adjusted odds ratio; CI, Confidence interval; EDHS, Egypt Demographic and Health Survey; HCV, Hepatitis C virus; Ref, Reference category.

<sup>†</sup>The analysis applied the EDHS sampling weights.

<sup>††</sup>The odds ratio was adjusted for sex, age, and type of place of residence.

<sup>‡</sup>β-coefficients were based on the multivariable regression analysis.

<sup>§</sup>The risk score was calculated by multiplying the β coefficient by 10 and then rounding the result to the nearest integer.

**Table 2** Performance of the Egypt Hepatitis C Risk Score

|                                                | <b>AUC<br/>(95% CI)</b> | <b>Risk score cut-<br/>off*</b> | <b>Sensitivity<br/>(95% CI)</b> | <b>Specificity<br/>(95% CI)</b> | <b>PPV<br/>(95% CI)</b> | <b>NPV<br/>(95% CI)</b> | <b>Proportion needing<br/>testing<br/>(95% CI)</b> |
|------------------------------------------------|-------------------------|---------------------------------|---------------------------------|---------------------------------|-------------------------|-------------------------|----------------------------------------------------|
| <b>Derived risk scores</b>                     |                         |                                 |                                 |                                 |                         |                         |                                                    |
| Risk score derived using the EDHS 2008         | 0.77<br>(0.76-0.78)     | 22.0                            | 73.7<br>(71.5-75.9)             | 68.5<br>(67.5-69.4)             | 27.8<br>(26.4-29.2)     | 94.1<br>(93.5-94.6)     | 37.2<br>(36.3-38.1)                                |
| Risk score derived using the EDHS 2014         | 0.78<br>(0.77- 0.80)    | 34.5                            | 64.0<br>(61.5-66.6)             | 78.2<br>(77.5-78.9)             | 22.2<br>(20.9-23.5)     | 95.7<br>(95.4-96.1)     | 25.5<br>(24.9-26.2)                                |
| <b>Validation of risk scores</b>               |                         |                                 |                                 |                                 |                         |                         |                                                    |
| 2008 risk score applied to the EDHS data 2014† | 0.75<br>(0.74-0.77)     | 22.0                            | 66.1<br>(63.5-68.6)             | 72.3<br>(71.5-73.1)             | 21.9<br>(20.6-23.2)     | 94.8<br>(94.3-95.2)     | 31.7<br>(30.9-32.5)                                |
| 2014 risk score applied to the EDHS data 2008‡ | 0.76<br>(0.74-0.77)     | 33.5                            | 70.0<br>(67.5-72.6)             | 70.0<br>(69.0-70.9)             | 24.7<br>(23.3-26.1)     | 94.3<br>(93.7-94.9)     | 34.6<br>(33.7-35.5)                                |

Abbreviations: AUC, Area under the curve; EDHS, Egypt Demographic and Health Survey; HCV, Hepatitis C virus; NPV, Negative predictive value; PPV, Positive predictive value.

\*The optimal cut-off for the score was determined by maximizing the sum of the sensitivity and specificity.

†The risk score assumes the age of the individuals in 2008 in order to account for the age shift.

‡The risk score assumes the age of the individuals in 2014 in order to account for the age shift.



**Table 3** Implications of selecting various score cutoffs on the different diagnostic metrics.

| Risk score cut-off           | Sensitivity (95% CI) | Specificity (95% CI) | PPV (95% CI)      | NPV (95% CI)     | Proportion needing testing (95% CI) | Proportion that are diagnosed (95% CI) |
|------------------------------|----------------------|----------------------|-------------------|------------------|-------------------------------------|----------------------------------------|
| <b>EDHS 2008 Risk Score*</b> |                      |                      |                   |                  |                                     |                                        |
| ≥2.0                         | 99.8 (99.4-100.0)    | 3.9 (3.5-4.3)        | 14.6 (13.9-15.3)  | 99.2 (97.7-99.8) | 96.5 (96.2-96.8)                    | 99.8 (99.4-100.0)                      |
| ≥4.0                         | 99.1 (98.5-99.5)     | 7.8 (7.3-8.4)        | 15.0 (14.3-15.7)  | 98.2 (96.9-99.0) | 92.8 (92.8-93.2)                    | 99.1 (98.1-99.5)                       |
| ≥5.0                         | 98.2 (97.4-98.8)     | 11.4 (10.8-12.1)     | 15.4 (14.7-16.1)  | 97.5 (96.4-98.3) | 89.3 (88.8-89.9)                    | 98.2 (97.4-98.8)                       |
| ≥6.0                         | 97.5 (69.5-98.2)     | 14.8 (14.1-15.6)     | 15.8 (15.1-16.6)  | 97.3 (96.3-98.0) | 86.1 (85.5-86.7)                    | 97.5 (96.6-98.2)                       |
| ≥9.0                         | 96.8 (95.8-97.6)     | 17.9 (17.1-18.7)     | 16.2 (15.5-17.0)  | 97.1 (96.2-97.8) | 83.2 (82.5-83.9)                    | 96.8 (95.8-97.6)                       |
| ≥11.0                        | 94.2 (92.9-95.3)     | 27.3 (26.4-28.2)     | 17.6 (16.7-18.4)  | 96.6 (95.6-97.3) | 74.9 (74.1-75.7)                    | 94.2 (92.9-95.3)                       |
| ≥12.0                        | 91.2 (89.6-92.5)     | 34.0 (33.1-35.0)     | 18.5 (17.6-19.4)  | 95.9 (95.2-96.5) | 68.9 (68.0-69.7)                    | 91.2 (89.6-92.5)                       |
| ≥13.0                        | 90.5 (88.9-91.9)     | 36.8 (35.8-37.7)     | 19.0 (18.2-20.0)  | 95.9 (95.2-96.5) | 66.3 (65.4-67.1)                    | 90.5 (88.9-91.9)                       |
| ≥14.0                        | 87.9 (86.2-89.5)     | 42.8 (41.8-43.8)     | 20.2 (19.2-21.1)  | 95.6 (94.9-96.2) | 61.0 (60.1-61.9)                    | 87.9 (86.2-89.5)                       |
| ≥15.0                        | 84.8 (82.9-86.5)     | 50.5 (49.5-51.5)     | 22.1 (21.0-23.1)  | 95.3 (94.7-95.8) | 54.0 (53.1-54.9)                    | 84.8 (82.9-86.5)                       |
| ≥16.0                        | 83.5 (81.5-85.3)     | 55.1 (54.0-56.1)     | 23.74 (22.6-24.9) | 95.3 (94.7-95.8) | 50.1 (49.2-50.9)                    | 83.5 (81.5-85.3)                       |
| ≥18.0                        | 82.4 (80.5-84.3)     | 57.3 (56.3-58.3)     | 24.1 (23.0-25.3)  | 95.2 (94.6-95.7) | 47.9 (47.0-48.8)                    | 82.4 (80.5-84.3)                       |
| ≥20.0                        | 79.1 (77.0-81.1)     | 62.7 (61.7-63.7)     | 25.8 (24.6-27.1)  | 94.8 (94.2-95.3) | 43.0 (42.1-43.9)                    | 79.1 (77.0-81.1)                       |
| ≥21.0                        | 77.1 (75.0-79.2)     | 64.7 (63.8-65.7)     | 26.5 (25.2-27.8)  | 94.5 (93.9-95.0) | 40.8 (39.9-41.6)                    | 77.2 (75.0-79.2)                       |
| ≥23.0                        | 73.7 (71.5-78.9)     | 68.5 (67.5-69.4)     | 27.8 (26.4-29.2)  | 94.1 (93.5-94.6) | 37.2 (36.3-38.1)                    | 73.7 (71.5-75.9)                       |
| ≥24.0                        | 67.5 (65.1-69.8)     | 73.7 (72.8-74.6)     | 29.7 (28.2-31.2)  | 93.3 (92.6-93.8) | 31.8 (30.9-32.6)                    | 67.5 (65.1-69.8)                       |
| ≥25.0                        | 65.6 (63.2-67.9)     | 75.7 (74.8-76.5)     | 30.7 (29.1-32.3)  | 93.0 (92.4-93.6) | 29.8 (29.0-30.6)                    | 65.6 (63.2-67.9)                       |
| ≥27.0                        | 62.3 (59.8-64.7)     | 78.5 (77.7-73.3)     | 32.3 (30.6-34.0)  | 92.7 (92.1-93.2) | 27.0 (26.2-27.8)                    | 62.3 (59.8-64.7)                       |
| ≥28.0                        | 56.7 (54.2-59.2)     | 82.6 (81.8-83.3)     | 34.9 (33.0-36.8)  | 92.1 (91.5-92.6) | 22.7 (21.9-23.4)                    | 56.7 (54.2-59.2)                       |
| ≥29.0                        | 52.5 (50.0-55.0)     | 85.1 (84.4-85.8)     | 36.7 (34.8-38.8)  | 91.6 (91.0-92.2) | 19.6 (18.9-20.3)                    | 52.5 (50.0-55.0)                       |
| ≥32.0                        | 47.6 (45.1-50.1)     | 87.6 (86.9-88.3)     | 38.7 (36.5-40.9)  | 91.0 (90.4-91.6) | 16.8 (16.2-17.5)                    | 47.6 (45.1-50.1)                       |
| ≥33.0                        | 34.7 (32.3-37.1)     | 92.0 (91.4-92.5)     | 41.5 (38.8-44.2)  | 89.5 (88.9-90.1) | 11.3 (10.7-11.9)                    | 34.7 (32.3-37.1)                       |
| ≥36.0                        | 28.4 (26.2-30.7)     | 94.2 (93.7-94.7)     | 44.6 (41.4-47.7)  | 88.9 (88.3-89.5) | 8.6 (8.1-9.1)                       | 28.4 (26.2-30.7)                       |
| ≥37.0                        | 21.3 (19.3-23.4)     | 95.6 (95.2-96.0)     | 44.3 (40.7-47.9)  | 88.1 (87.4-88.7) | 6.5 (6.1-7.0)                       | 21.3 (19.3-23.4)                       |
| ≥41.0                        | 12.7 (11.1-14.5)     | 98.1 (97.8-98.3)     | 51.8 (46.7-56.9)  | 87.2 (86.6-87.9) | 3.3 (3.0-3.6)                       | 12.7 (11.1-14.5)                       |
| <b>EDHS 2014 Risk Score*</b> |                      |                      |                   |                  |                                     |                                        |
| ≥5.0                         | 99.4 (98.8-99.7)     | 4.3 (4.0-4.7)        | 9.1 (8.7-9.6)     | 98.6 (97.3-99.4) | 96.0 (95.7-96.3)                    | 99.4 (98.8-99.7)                       |
| ≥8.0                         | 99.2 (98.5-99.6)     | 8.3 (7.9-8.9)        | 9.5 (9.0-10.0)    | 99.0 (98.3-99.5) | 92.3 (91.9-92.7)                    | 99.2 (98.5-99.6)                       |
| ≥12.0                        | 98.7 (97.9-99.2)     | 13.2 (12.6-13.7)     | 9.9 (9.4-10.4)    | 99.0 (98.5-99.4) | 87.9 (87.3-88.3)                    | 98.7 (97.9-99.2)                       |
| ≥13.0                        | 98.3 (97.5-98.9)     | 16.5 (15.9-17.1)     | 10.2 (9.7-10.8)   | 99.0 (98.5-99.4) | 84.7 (84.2-85.3)                    | 98.3 (97.5-98.9)                       |
| ≥15.0                        | 97.5 (96.6-98.3)     | 20.7 (20.1-21.4)     | 10.7 (10.1-11.2)  | 98.9 (98.4-99.2) | 80.9 (80.3-81.5)                    | 97.5 (96.6-98.3)                       |
| ≥17.0                        | 96.7 (95.6-97.5)     | 24.7 (24.0-25.4)     | 11.1 (10.5-11.6)  | 98.7 (98.3-99.1) | 77.2 (76.5-77.8)                    | 96.7 (95.6-97.5)                       |
| ≥20.0                        | 96.2 (95.0-97.1)     | 27.5 (26.7-28.2)     | 11.4 (10.8-12.0)  | 98.7 (98.3-99.0) | 74.5 (73.9-75.2)                    | 96.2 (95.0-97.1)                       |
| ≥22.0                        | 92.2 (90.7-93.6)     | 38.5 (37.7-39.2)     | 12.7 (12.0-13.3)  | 98.1 (97.7-98.4) | 64.0 (63.3-64.7)                    | 92.2 (90.7-93.4)                       |
| ≥23.0                        | 90.8 (89.2-92.3)     | 41.5 (40.7-42.4)     | 13.1 (12.4-13.8)  | 97.9 (97.5-98.2) | 61.0 (60.3-61.8)                    | 90.8 (89.2-92.3)                       |
| ≥25.0                        | 89.2 (87.4-90.7)     | 47.1 (46.3-47.9)     | 14.0 (13.3-14.8)  | 97.8 (97.5-98.2) | 55.9 (55.2-56.7)                    | 89.2 (87.4-90.7)                       |
| ≥26.0                        | 86.1 (84.1-87.8)     | 52.6 (51.8-53.4)     | 15.0 (14.2-15.8)  | 97.5 (97.1-97.8) | 50.6 (49.9-51.4)                    | 86.1 (84.1-87.8)                       |
| ≥27.0                        | 83.9 (81.9-85.8)     | 55.1 (54.3-55.9)     | 15.3 (14.5-16.2)  | 97.3 (96.9-97.6) | 48.1 (47.3-48.9)                    | 83.9 (81.3-85.8)                       |
| ≥28.0                        | 81.9 (79.8-84.0)     | 57.8 (57.0-58.6)     | 15.8 (15.0-16.7)  | 97.1 (96.7-97.4) | 45.5 (44.7-46.2)                    | 81.9 (79.8-83.9)                       |

|       |                  |                  |                  |                  |                  |                  |
|-------|------------------|------------------|------------------|------------------|------------------|------------------|
| ≥30.0 | 77.1 (74.8-79.2) | 64.8 (64.0-65.6) | 17.5 (16.6-18.5) | 96.7 (96.3-97.0) | 38.8 (38.0-39.5) | 77.1 (74.8-79.2) |
| ≥31.0 | 71.4 (69.0-73.8) | 70.6 (69.8-71.3) | 19.0 (18.0-20.1) | 96.2 (95.8-96.6) | 33.1 (32.3-33.8) | 71.4 (69.0-73.8) |
| ≥33.0 | 69.1 (66.7-71.5) | 72.8 (72.1-73.5) | 19.8 (18.7-20.9) | 96.1 (95.7-96.4) | 30.8 (30.1-31.5) | 69.1 (66.7-71.5) |
| ≥34.0 | 66.2 (63.7-68.7) | 75.9 (75.2-76.6) | 21.0 (19.8-22.2) | 95.9 (95.5-96.2) | 27.8 (27.1-28.5) | 66.2 (63.7-68.7) |
| ≥35.0 | 64.1 (61.5-66.6) | 78.2 (77.5-78.9) | 22.2 (20.9-23.5) | 95.7 (95.4-96.1) | 25.5 (24.9-26.2) | 64.1 (61.5-66.6) |
| ≥37.0 | 58.5 (55.9-61.1) | 82.7 (82.0-83.3) | 24.6 (23.2-26.1) | 95.4 (95.0-95.7) | 21.1 (20.5-21.7) | 58.5 (55.9-61.1) |
| ≥38.0 | 53.7 (51.1-56.3) | 84.7 (84.1-85.2) | 25.3 (23.8-26.9) | 95.0 (94.6-95.3) | 18.7 (18.1-19.3) | 53.7 (51.1-56.3) |
| ≥39.0 | 49.3 (46.7-52.0) | 86.7 (86.1-87.2) | 26.4 (24.7-28.1) | 94.5 (94.2-95.0) | 16.5 (15.9-17.1) | 49.3 (46.7-52.0) |
| ≥40.0 | 45.6 (43.0-48.2) | 88.6 (88.1-89.1) | 27.9 (26.1-29.8) | 94.4 (94.0-94.8) | 14.4 (13.1-15.0) | 45.6 (43.0-48.2) |
| ≥42.0 | 42.1 (39.5-44.7) | 90.1 (89.6-90.6) | 29.2 (27.3-31.3) | 94.1 (93.7-94.5) | 12.7 (12.2-13.2) | 42.1 (39.5-44.7) |
| ≥43.0 | 37.2 (34.6-39.7) | 92.1 (91.7-92.6) | 31.4 (29.1-33.6) | 93.8 (93.4-94.2) | 10.4 (9.9-10.8)  | 37.2 (34.6-39.7) |
| ≥45.0 | 32.3 (29.8-34.8) | 94.0 (93.6-94.4) | 34.3 (31.7-36.9) | 93.5 (93.1-93.9) | 8.3 (7.9-8.7)    | 32.3 (29.8-34.8) |
| ≥48.0 | 22.0 (19.9-24.3) | 96.8 (96.5-97.1) | 40.0 (36.6-43.6) | 92.8 (92.2-93.2) | 4.8 (4.5-5.1)    | 22.0 (19.9-24.3) |
| ≥50.0 | 15.4 (13.6-17.4) | 98.1 (97.8-98.3) | 43.7 (39.3-48.2) | 92.3 (91.9-92.7) | 3.1 (2.8-3.4)    | 15.4 (13.6-17.4) |
| ≥53.0 | 7.4 (6.1-8.9)    | 99.3 (99.2-99.4) | 51.5 (44.4-58.5) | 91.8 (91.4-92.3) | 1.3 (1.1-1.4)    | 7.4 (6.1-8.9)    |

Abbreviations: AUC, Area under the curve; EDHS, Egypt Demographic and Health Survey; HCV, Hepatitis C virus; NPV, Negative predictive value; PPV, Positive predictive value.

\*The AUC for the derived risk score using the EDHS 2008 was 0.77 (95% CI: 0.76-0.78).

†The AUC for the derived risk score using the EDHS 2014 was 0.78 (95% CI: 0.77-0.80).

## References

1. Stanaway, J.D., et al., *The global burden of viral hepatitis from 1990 to 2013: findings from the Global Burden of Disease Study 2013*. The Lancet, 2016. **388**(10049): p. 1081-1088.
2. World Health Organization, *Combating hepatitis B and C to reach elimination by 2030: advocacy brief*. 2016, World Health Organization.
3. Lauer, G.M. and B.D. Walker, *Hepatitis C virus infection*. New England journal of medicine, 2001. **345**(1): p. 41-52.
4. World Health Organization. *Hepatitis C*. 2021, 27 July 2021; Available from: <https://www.who.int/news-room/fact-sheets/detail/hepatitis-c>.
5. Calvaruso, V. and A. Craxi, *Hepatic benefits of HCV cure*. Journal of Hepatology, 2020. **73**(6): p. 1548-1556.
6. Ayoub, H.H. and L.J. Abu-Raddad, *Impact of treatment on hepatitis C virus transmission and incidence in Egypt: A case for treatment as prevention*. J Viral Hepat, 2017. **24**(6): p. 486-495.
7. Ayoub, H.H. and L.J. Abu-Raddad, *Treatment as prevention for hepatitis C virus in Pakistan: mathematical modelling projections*. BMJ Open, 2019. **9**(5): p. e026600.
8. World Health Organization, *Global health sector strategy on viral hepatitis 2016-2021. Towards ending viral hepatitis*. 2016, World Health Organization.
9. World Health Organization, *Global hepatitis report 2017*. 2017, World Health Organization.
10. World Health Organization, *Epidemiology of hepatitis C virus in the WHO Eastern Mediterranean Region: implications for strategic action*. 2020.
11. Chemaitelly, H., et al., *The epidemiology of hepatitis C virus in Afghanistan: systematic review and meta-analysis*. International Journal of Infectious Diseases, 2015. **40**: p. 54-63.
12. Mohamoud, Y.A., S. Riome, and L.J. Abu-Raddad, *Epidemiology of hepatitis C virus in the Arabian Gulf countries: Systematic review and meta-analysis of prevalence*. International Journal of Infectious Diseases, 2016. **46**: p. 116-125.
13. Chemaitelly, H., K. Chaabna, and L.J. Abu-Raddad, *The Epidemiology of Hepatitis C Virus in the Fertile Crescent: Systematic Review and Meta-Analysis*. PLOS ONE, 2015. **10**(8): p. e0135281.
14. Fadlalla, F.A., et al., *The Epidemiology of Hepatitis C Virus in the Maghreb Region: Systematic Review and Meta-Analyses*. PloS one, 2015. **10**(3): p. e0121873.
15. Chaabna, K., S.P. Kouyoumjian, and L.J. Abu-Raddad, *Hepatitis C virus epidemiology in Djibouti, Somalia, Sudan, and Yemen: systematic review and meta-analysis*. PloS one, 2016. **11**(2): p. e0149966.
16. Mahmud, S., V. Akbarzadeh, and L.J. Abu-Raddad, *The epidemiology of hepatitis C virus in Iran: Systematic review and meta-analyses*. Sci Rep, 2018. **8**(1): p. 150.
17. Waked, I., et al., *Screening and Treatment Program to Eliminate Hepatitis C in Egypt*. N Engl J Med, 2020. **382**(12): p. 1166-1174.
18. Al Kanaani, Z., et al., *The epidemiology of hepatitis C virus in Pakistan: systematic review and meta-analyses*. R Soc Open Sci, 2018. **5**(4): p. 180257.
19. Ayoub, H.H., Z. Al Kanaani, and L.J. Abu-Raddad, *Characterizing the temporal evolution of the hepatitis C virus epidemic in Pakistan*. J Viral Hepat, 2018. **25**(6): p. 670-679.

20. Mahmud, S., Z. Al Kanaani, and L.J. Abu-Raddad, *Characterization of the hepatitis C virus epidemic in Pakistan*. BMC Infect Dis, 2019. **19**(1): p. 809.
21. Noble, D., et al., *Risk models and scores for type 2 diabetes: systematic review*. Bmj, 2011. **343**.
22. Collins, G.S., et al., *Developing risk prediction models for type 2 diabetes: a systematic review of methodology and reporting*. BMC medicine, 2011. **9**(1): p. 1-14.
23. Brown, N., et al., *Risk scores based on self-reported or available clinical data to detect undiagnosed type 2 diabetes: a systematic review*. Diabetes research and clinical practice, 2012. **98**(3): p. 369-385.
24. Awad, S.F., et al., *A diabetes risk score for Qatar utilizing a novel mathematical modeling approach to identify individuals at high risk for diabetes*. Scientific reports, 2021. **11**(1): p. 1-10.
25. El-Zanaty, F. and A. Way, *Egypt Demographic and Health Survey 2008*. Cairo, Egypt Ministry of Health, El Zanaty and Associates, and Macro International. 2009.
26. El-Zanaty, F., *Egypt Health Issue Survey 2015*. Cairo, Egypt and Rockville, Maryland, USA: Ministry of Health and Population and ICF International. 2015.
27. Rutstein, S.O. and G. Rojas, *Guide to DHS statistics*. Calverton, MD: ORC Macro, 2006. **38**.
28. [dataset] MEASURE DHS. *The DHS Program Demographic and Health Surveys*. , July 2021; Available from: <https://dhsprogram.com/>.
29. Ayoub, H.H., et al., *Characterizing the historical role of parenteral antischistosomal therapy in hepatitis C virus transmission in Egypt*. International journal of epidemiology, 2020. **49**(3): p. 798-809.
30. Mohamoud, Y.A., et al., *The epidemiology of hepatitis C virus in Egypt: a systematic review and data synthesis*. BMC infectious diseases, 2013. **13**(1): p. 1-21.
31. Kouyoumjian, S.P., H. Chemaitelly, and L.J. Abu-Raddad, *Characterizing hepatitis C virus epidemiology in Egypt: systematic reviews, meta-analyses, and meta-regressions*. Scientific reports, 2018. **8**(1): p. 1-17.
32. Jovanovic, M.R., et al., *Does the Strategy of Risk Group Testing for Hepatitis C Hit the Target?* Frontiers in Pharmacology, 2017. **8**.
33. Smart, A., et al., *Identification of Risk Factors for Testing of Hepatitis C in Non-Birth Cohort Patients: Is Universal Screening Necessary?* J Addict Med, 2021. **15**(2): p. 109-112.
34. Jordan, A.E. and D.C. Perlman, *The Shift in Emphasis From Risk-Based to Age-Based Hepatitis C Virus (HCV) Testing in the US Tends to Remove Injection Drug Use From Discourse on HCV*. Subst Use Misuse, 2017. **52**(3): p. 340-350.
35. Qureshi, H., et al., *Prevalence of hepatitis B and C viral infections in pakistan: Findings of a national survey appealing for effective prevention and control measures. [French]*. Eastern Mediterranean Health Journal, 2010. **16**(SUPPL.): p. S15-23.
36. Daw, M.A. and A. El-Bouzedi, *Prevalence of hepatitis B and hepatitis C infection in Libya: results from a national population based survey*. BMC Infect Dis, 2014. **14**: p. 17.
37. Mahmud, S., et al., *Individual-level key associations and modes of exposure for hepatitis C virus infection in the Middle East and North Africa: a systematic synthesis*. Ann Epidemiol, 2018. **28**(7): p. 452-461.
38. Harfouche, M., et al., *Hepatitis C virus viremic rate in the Middle East and North Africa: Systematic synthesis, meta-analyses, and meta-regressions*. PLoS One, 2017. **12**(10): p.

- e0187177.
39. Harfouche, M., et al., *Epidemiology of hepatitis C virus among hemodialysis patients in the Middle East and North Africa: systematic syntheses, meta-analyses, and meta-regressions*. *Epidemiol Infect*, 2017. **145**(15): p. 3243-3263.
  40. Heijnen, M., G.R. Mumtaz, and L.J. Abu-Raddad, *Status of HIV and hepatitis C virus infections among prisoners in the Middle East and North Africa: review and synthesis*. *J Int AIDS Soc*, 2016. **19**(1): p. 20873.
  41. Mahmud, S., et al., *Hepatitis C Virus Infection in Populations With Liver-Related Diseases in the Middle East and North Africa*. *Hepatol Commun*, 2020. **4**(4): p. 577-587.
  42. Mahmud, S., et al., *Characterizing trends and associations for hepatitis C virus antibody prevalence in the Middle East and North Africa: meta-regression analyses*. *Sci Rep*, 2022. **12**(1): p. 20637.
  43. Mahmud, S., et al., *The status of hepatitis C virus infection among people who inject drugs in the Middle East and North Africa*. *Addiction*, 2020. **115**(7): p. 1244-1262.
  44. Mohamoud, Y.A., F.D. Miller, and L.J. Abu-Raddad, *Potential for human immunodeficiency virus parenteral transmission in the Middle East and North Africa: an analysis using hepatitis C virus as a proxy biomarker*. *World J Gastroenterol*, 2014. **20**(36): p. 12734-52.
  45. Mahmud, S., et al., *Key associations for hepatitis C virus genotypes in the Middle East and North Africa*. *J Med Virol*, 2020. **92**(3): p. 386-393.
  46. Chemaitelly, H., et al., *Who to Test for Hepatitis C Virus in the Middle East and North Africa?: Pooled Analyses of 2,500 Prevalence Measures, Including 49 Million Tests*. *Hepatol Commun*, 2019. **3**(3): p. 325-339.
  47. Mumtaz, G.R., et al., *Status of the HIV epidemic in key populations in the Middle East and north Africa: knowns and unknowns*. *Lancet HIV*, 2022. **9**(7): p. e506-e516.
  48. Benova, L., S.F. Awad, and L.J. Abu-Raddad, *Estimate of vertical transmission of Hepatitis C virus in Pakistan in 2007 and 2012 birth cohorts*. *J Viral Hepat*, 2017. **24**(12): p. 1177-1183.
  49. Benova, L., et al., *Estimation of hepatitis C virus infections resulting from vertical transmission in Egypt*. *Hepatology*, 2015. **61**(3): p. 834-42.
  50. Benova, L., et al., *Vertical transmission of hepatitis C virus: systematic review and meta-analysis*. *Clin Infect Dis*, 2014. **59**(6): p. 765-73.

A.

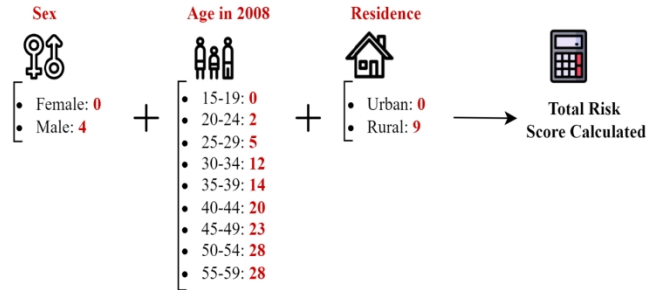

B.

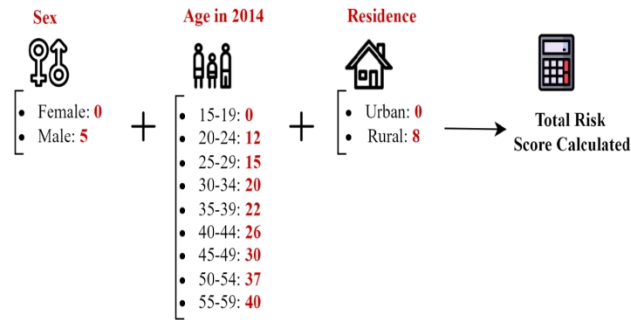

Abbreviations: EDHS, Egypt Demographic and Health Survey; ROC, receiver operating characteristics. The two scores exhibited comparable structures and diagnostic performances, with minor differences attributed to sampling variation of the same population across two distinct rounds of the EDHS surveys. Details on the derivation of these scores are provided in the Methods and Results sections.

Mathematical formula of the derived Egypt Hepatitis C Risk Score. A) Egypt Hepatitis C Risk Score using the EDHS 2008. B) Egypt Hepatitis C Risk Score using the EDHS 2014.

215x279mm (231 x 223 DPI)

1  
2  
3  
4  
5  
6  
7  
8  
9  
10  
11  
12  
13  
14  
15  
16  
17  
18  
19  
20  
21  
22  
23  
24  
25  
26  
27  
28  
29  
30  
31  
32  
33  
34  
35  
36  
37  
38  
39  
40  
41  
42  
43  
44  
45  
46  
47  
48  
49  
50  
51  
52  
53  
54  
55  
56  
57  
58  
59  
60

A.

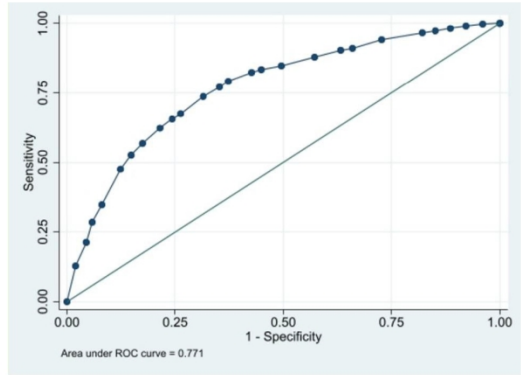

B.

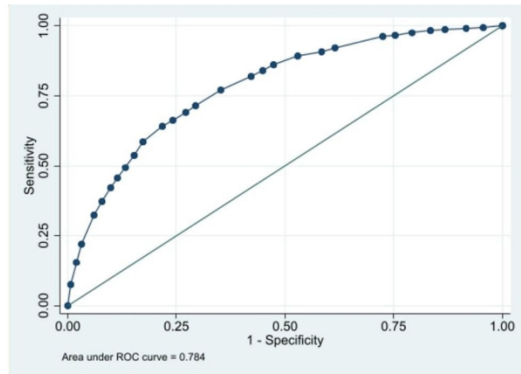

Abbreviations: EDHS, Egypt Demographic and Health Survey; ROC, receiver operating characteristics.

Diagnostic performance of the Egypt Hepatitis C Risk Score using the area under the (ROC) curve. A) Using the EDHS 2008 data. B) Using the EDHS 2014 data.

215x279mm (204 x 204 DPI)

1  
2  
3  
4  
5  
6  
7  
8  
9  
10  
11  
12  
13  
14  
15  
16  
17  
18  
19  
20  
21  
22  
23  
24  
25  
26  
27  
28  
29  
30  
31  
32  
33  
34  
35  
36  
37  
38  
39  
40  
41  
42  
43  
44  
45  
46  
47  
48  
49  
50  
51  
52  
53  
54  
55  
56  
57  
58  
59  
60

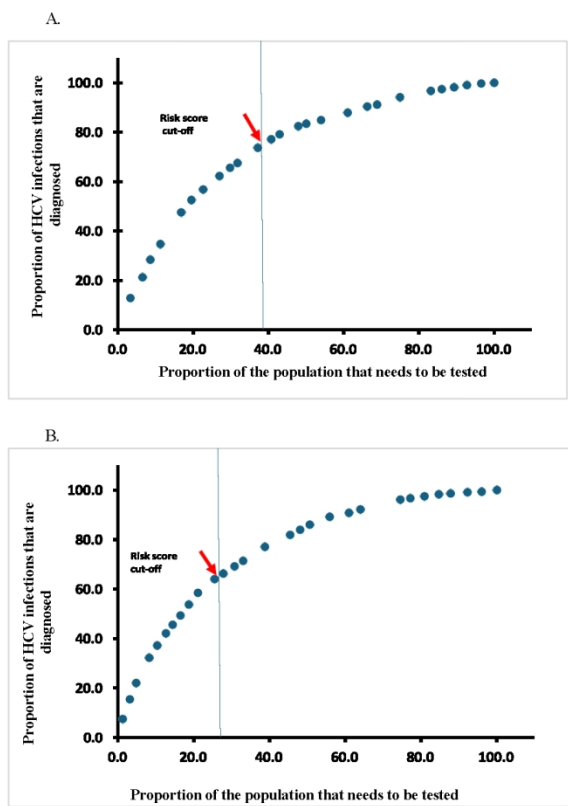

Proportion of HCV infections in the population that are diagnosed as a function of the proportion of the population that needs to be tested to identify these infections. The figure shows the effect of prioritization of testing for those with higher to lower risk score. A) Using the EDHS 2008 data. B) Using the EDHS 2014 data.

215x279mm (200 x 200 DPI)



**Table S1** Characteristics of individuals tested for HCV antibodies in the EDHS 2008 and 2014

| Characteristics                   | EDHS 2008        |                                      |         | EDHS 2014        |                                      |            |
|-----------------------------------|------------------|--------------------------------------|---------|------------------|--------------------------------------|------------|
|                                   | Total tested (%) | HCV antibody positive (proportion %) | p-value | Total tested (%) | HCV antibody positive (proportion %) | p-value    |
| <b>No</b>                         | 11,126           | 1,571                                |         | 26,047           | 1,456                                |            |
| <b>Sex</b>                        |                  |                                      |         |                  |                                      |            |
| Female                            | 6,052 (54.4)     | 711 (11.8)                           | <0.001  | 13,707 (52.6)    | 660 (4.8)                            | <0.001     |
| Male                              | 5,074 (45.6)     | 860 (17.0)                           |         | 12,340 (47.4)    | 796 (6.4)                            |            |
| <b>Age group (years)</b>          |                  |                                      |         |                  |                                      |            |
| 1-4                               | -                | -                                    | -       | 3,282 (12.6)     | 10 (0.3)                             |            |
| 5-9                               | -                | -                                    | -       | 3,601 (13.8)     | 10 (0.3)                             |            |
| 10-14                             | -                | -                                    | -       | 3,161 (12.1)     | 23 (0.7)                             |            |
| 15-19                             | 2,000 (18.0)     | 82 (4.1)                             |         | 2,568 (9.9)      | 30 (1.2)                             |            |
| 20-24                             | 1,837 (16.5)     | 91 (5.0)                             |         | 1,976 (7.6)      | 54 (2.7)                             |            |
| 25-29                             | 1,520 (13.7)     | 92 (6.1)                             |         | 2,358 (9.0)      | 88 (2.7)                             |            |
| 30-34                             | 1,244 (11.2)     | 133 (10.7)                           |         | 2,076 (8.0)      | 114 (5.5)                            | <0.001     |
| 35-39                             | 1,141 (10.3)     | 147 (12.9)                           | <0.001  | 1,853 (7.1)      | 130 (7.0)                            |            |
| 40-44                             | 1,069 (9.6)      | 238 (22.3)                           |         |                  | 1,468 (5.6)                          | 146 (10.0) |
| 45-49                             | 939 (8.4)        | 275 (29.3)                           |         | 1,380 (5.3)      | 208 (15.1)                           |            |
| 50-54                             | 728 (6.5)        | 272 (37.4)                           |         | 1,334 (5.1)      | 337 (25.3)                           |            |
| 55-59                             | 648 (5.8)        | 241 (37.2)                           |         | 990 (3.8)        | 306 (30.9)                           |            |
| <b>Type of place of residence</b> |                  |                                      |         |                  |                                      |            |
| Urban                             | 4,448 (40.0)     | 442 (9.9)                            | <0.001  | 11,955 (45.9)    | 546 (4.6)                            | <0.001     |
| Rural                             | 6,678 (60.0)     | 1,129 (16.9)                         |         | 14,092 (54.1)    | 910 (6.5)                            |            |

Abbreviations: EDHS, Egypt Demographic and Health Survey; HCV, Hepatitis C virus

**Table S2 STROBE checklist for cross-sectional studies**

|                           | <b>Item No</b> | <b>Recommendation</b>                                                                                                                                                                                                                                                                           | <b>Main Text Page No</b>                                                                                                                                                                                      |
|---------------------------|----------------|-------------------------------------------------------------------------------------------------------------------------------------------------------------------------------------------------------------------------------------------------------------------------------------------------|---------------------------------------------------------------------------------------------------------------------------------------------------------------------------------------------------------------|
| <b>Title and abstract</b> | 1              | (a) Indicate the study's design with a commonly used term in the title or the abstract                                                                                                                                                                                                          | Abstract <b>page 2</b>                                                                                                                                                                                        |
|                           |                | (b) Provide in the abstract an informative and balanced summary of what was done and what was found                                                                                                                                                                                             | Abstract <b>page 2</b>                                                                                                                                                                                        |
| <b>Introduction</b>       |                |                                                                                                                                                                                                                                                                                                 |                                                                                                                                                                                                               |
| Background/rationale      | 2              | Explain the scientific background and rationale for the investigation being reported                                                                                                                                                                                                            | Introduction <b>page 4</b>                                                                                                                                                                                    |
| Objectives                | 3              | State specific objectives, including any prespecified hypotheses                                                                                                                                                                                                                                | Introduction <b>page 5</b>                                                                                                                                                                                    |
| <b>Methods</b>            |                |                                                                                                                                                                                                                                                                                                 |                                                                                                                                                                                                               |
| Study design              | 4              | Present key elements of study design early in the paper                                                                                                                                                                                                                                         | Methods ('Egypt Demographic and Health Surveys', 'Risk score derivation' & 'Performance and validation of the risk score') <b>pages 5-8</b>                                                                   |
| Setting                   | 5              | Describe the setting, locations, and relevant dates, including periods of recruitment, exposure, follow-up, and data collection                                                                                                                                                                 | Methods ('Egypt Demographic and Health Surveys') <b>pages 5-6</b>                                                                                                                                             |
| Participants              | 6              | (a) Give the eligibility criteria, and the sources and methods of selection of participants                                                                                                                                                                                                     | Methods ('Egypt Demographic and Health Surveys') <b>pages 5-6</b>                                                                                                                                             |
| Variables                 | 7              | Clearly define all outcomes, exposures, predictors, potential confounders, and effect modifiers. Give diagnostic criteria, if applicable                                                                                                                                                        | Methods ('Egypt Demographic and Health Surveys', 'Risk score derivation' & 'Performance and validation of the risk score') <b>pages 5-8</b> & Table S1 <b>page 1</b>                                          |
| Data sources/measurement  | 8              | For each variable of interest, give sources of data and details of methods of assessment (measurement). Describe comparability of assessment methods if there is more than one group                                                                                                            | Methods ('Egypt Demographic and Health Surveys', 'Risk score derivation' & 'Performance and validation of the risk score') <b>pages 5-8</b> & Table 1 & Table 3 & Tables S2-S3 <b>pages 3-4</b> & Figures 1-2 |
| Bias                      | 9              | Describe any efforts to address potential sources of bias                                                                                                                                                                                                                                       | Methods ('Risk score derivation' & 'Performance and validation of the risk score') <b>pages 6-8</b> & Table 2 & Figures 1-2                                                                                   |
| Study size                | 10             | Explain how the study size was arrived at                                                                                                                                                                                                                                                       | Not applicable, see Methods ('Egypt Demographic and Health Surveys') <b>pages 5-6</b>                                                                                                                         |
| Quantitative variables    | 11             | Explain how quantitative variables were handled in the analyses. If applicable, describe which groupings were chosen and why                                                                                                                                                                    | Methods ('Egypt Demographic and Health Surveys', 'Risk score derivation' & 'Performance and validation of the risk score') <b>pages 5-8</b> & Tables 1-3 & Table S3                                           |
| Statistical methods       | 12             | (a) Describe all statistical methods, including those used to control for confounding                                                                                                                                                                                                           | Methods ('Risk score derivation' & 'Performance and validation of the risk score') <b>pages 5-8</b>                                                                                                           |
|                           |                | (b) Describe any methods used to examine subgroups and interactions                                                                                                                                                                                                                             | Not applicable, see Methods ('Risk score derivation' & 'Performance and validation of the risk score') <b>pages 6-8</b>                                                                                       |
|                           |                | (c) Explain how missing data were addressed                                                                                                                                                                                                                                                     | Not applicable, see Methods ('Egypt Demographic and Health Surveys', 'Risk score derivation') <b>pages 5-8</b>                                                                                                |
|                           |                | (d) If applicable, describe analytical methods taking account of sampling strategy                                                                                                                                                                                                              | Not applicable                                                                                                                                                                                                |
|                           |                | (e) Describe any sensitivity analyses                                                                                                                                                                                                                                                           | Not applicable                                                                                                                                                                                                |
| <b>Results</b>            |                |                                                                                                                                                                                                                                                                                                 |                                                                                                                                                                                                               |
| Participants              | 13             | (a) Report numbers of individuals at each stage of study—eg numbers potentially eligible, examined for eligibility, confirmed eligible, included in the study, completing follow-up, and analysed<br>(b) Give reasons for non-participation at each stage<br>(c) Consider use of a flow diagram | Table 1 & Tables S1 & Table S3                                                                                                                                                                                |
| Descriptive data          | 14             | (a) Give characteristics of study participants (eg demographic, clinical, social) and information on exposures and potential confounders                                                                                                                                                        | Table 1 & Table S1 & Table S3 & Figure S1                                                                                                                                                                     |
|                           |                | (b) Indicate number of participants with missing data for each variable of interest                                                                                                                                                                                                             | Not applicable, see Methods ('Egypt Demographic and Health Surveys') <b>pages 5-6</b>                                                                                                                         |
| Outcome data              | 15             | Report numbers of outcome events or summary measures                                                                                                                                                                                                                                            | Results <b>pages 8-11</b> , Figures 1-2, Figure S1, Tables 1-3 & Table S1                                                                                                                                     |
| Main results              | 16             | (a) Give unadjusted estimates and, if applicable,                                                                                                                                                                                                                                               | Table 1 & Table S3                                                                                                                                                                                            |

|                          |    |                                                                                                                                                                            |                                                |
|--------------------------|----|----------------------------------------------------------------------------------------------------------------------------------------------------------------------------|------------------------------------------------|
|                          |    | confounder-adjusted estimates and their precision (eg, 95% confidence interval). Make clear which confounders were adjusted for and why they were included                 |                                                |
|                          |    | (b) Report category boundaries when continuous variables were categorized                                                                                                  | Tables 1-3 & Table S1 & Table S3               |
|                          |    | © If relevant, consider translating estimates of relative risk into absolute risk for a meaningful time period                                                             | Tables 2-3 & Table S3 & Figure S1              |
| Other analyses           | 17 | Report other analyses done—eg analyses of subgroups and interactions, and sensitivity analyses                                                                             | Results <b>pages 8-11</b> & Table 2 & Figure 2 |
| <b>Discussion</b>        |    |                                                                                                                                                                            |                                                |
| Key results              | 18 | Summarise key results with reference to study objectives                                                                                                                   | Discussion <b>pages 11-12</b> , paragraphs 1-3 |
| Limitations              | 19 | Discuss limitations of the study, taking into account sources of potential bias or imprecision. Discuss both direction and magnitude of any potential bias                 | Discussion, paragraph 9 <b>page 14</b>         |
| Interpretation           | 20 | Give a cautious overall interpretation of results considering objectives, limitations, multiplicity of analyses, results from similar studies, and other relevant evidence | Discussion, paragraphs 4-6 <b>pages 12-13</b>  |
| Generalisability         | 21 | Discuss the generalisability (external validity) of the study results                                                                                                      | Discussion, paragraphs 7-8 <b>pages 13-14</b>  |
| <b>Other information</b> |    |                                                                                                                                                                            |                                                |
| Funding                  | 22 | Give the source of funding and the role of the funders for the present study and, if applicable, for the original study on which the present article is based              | Acknowledgements <b>page 16</b>                |

**Table S3** Results of univariable and multivariable regression analyses to derive the Egypt Hepatitis C Risk Score using data from EDHS 2008 and EDHS 2014

|                                   | EDHS 2008           |         |                     |         |      |              | EDHS 2014           |         |                     |         |      |              |
|-----------------------------------|---------------------|---------|---------------------|---------|------|--------------|---------------------|---------|---------------------|---------|------|--------------|
|                                   | OR* (95% CI)        | p-value | aOR† (95% CI)       | p-value | β‡   | Risk score § | OR* (95% CI)        | p-value | aOR† (95% CI)       | p-value | β‡   | Risk score § |
| <b>Sex</b>                        |                     |         |                     |         |      |              |                     |         |                     |         |      |              |
| Female                            | 1.00                |         | 1.00                |         | Ref  | 0            | 1.00                |         | 1.00                |         | Ref  | 0            |
| Male                              | 1.52 (1.35-1.70)    | <0.001  | 1.52 (1.34-1.73)    | <0.001  | 0.42 | 4            | 1.60 (1.41-1.83)    | <0.001  | 1.62 (1.40-1.87)    | <0.001  | 0.48 | 5            |
| <b>Age group (years)</b>          |                     |         |                     |         |      |              |                     |         |                     |         |      |              |
| 15-19                             | 1.00                |         | 1.00                |         |      | 0            | 1.00                |         | 1.00                |         |      |              |
| 20-24                             | 1.19 (0.86-1.64)    | 0.282   | 1.23 (0.89-1.69)    | 0.213   | 0.20 | 2            | 3.18 (1.82-5.58)    | <0.001  | 3.30 (1.88-5.81)    | <0.001  | 1.19 | 12           |
| 25-29                             | 1.52 (1.09-2.11)    | 0.014   | 1.60 (1.15-2.23)    | 0.005   | 0.47 | 5            | 4.38 (2.54-7.55)    | <0.001  | 4.50 (2.60-7.79)    | <0.001  | 1.51 | 15           |
| 30-34                             | 3.09 (2.27-4.21)    | <0.001  | 3.21 (2.35-4.39)    | <0.001  | 1.17 | 12           | 7.33 (4.29-12.49)   | <0.001  | 7.41 (4.35-12.65)   | <0.001  | 2.00 | 20           |
| 35-39                             | 3.69 (2.70-5.06)    | <0.001  | 3.89 (2.84-5.34)    | <0.001  | 1.36 | 14           | 8.56 (5.04-14.52)   | <0.001  | 8.74 (5.13-14.88)   | <0.001  | 2.17 | 22           |
| 40-44                             | 6.91 (5.15-9.26)    | <0.001  | 7.36 (5.47-9.90)    | <0.001  | 1.99 | 20           | 12.54 (7.51-20.95)  | <0.001  | 13.03 (7.79-21.81)  | <0.001  | 2.57 | 26           |
| 45-49                             | 9.30 (6.95-12.27)   | <0.001  | 10.34 (7.71-13.85)  | <0.001  | 2.34 | 23           | 18.64 (11.33-30.66) | <0.001  | 19.23 (11.66-31.69) | <0.001  | 2.96 | 30           |
| 50-54                             | 14.36 (10.78-19.13) | <0.001  | 16.43 (12.29-21.96) | <0.001  | 2.80 | 28           | 37.25 (22.75-60.98) | <0.001  | 41.11 (25.05-67.46) | <0.001  | 3.71 | 37           |
| 55-59                             | 15.09 (11.13-20.45) | <0.001  | 17.05 (12.50-23.26) | <0.001  | 2.84 | 28           | 49.26 (30.06-80.72) | <0.001  | 55.31 (33.59-91.06) | <0.001  | 4.01 | 40           |
| <b>Type of place of residence</b> |                     |         |                     |         |      |              |                     |         |                     |         |      |              |
| Urban                             | 1.00                |         | 1.00                |         | Ref  | 0            | 1.00                |         | 1.00                |         | Ref  | 0            |
| Rural                             | 1.91 (1.66-2.19)    | <0.001  | 2.34 (2.0-2.7)      | <0.001  | 0.85 | 9            | 1.73 (1.46-2.1)     | <0.001  | 2.15 (1.78-2.59)    | <0.001  | 0.76 | 8            |

Abbreviations: aOR, Adjusted odds ratio; CI, Confidence interval; EDHS, Egypt Demographic and Health Survey; HCV, Hepatitis C virus; OR, Odds ratio; Ref, Reference category.

\*The analysis applied the EDHS sampling weights.

†The odds ratio was adjusted for sex, age, and type of place of residence.

‡β-coefficients were based on the multivariable regression analysis.

§The risk score was calculated by multiplying the β coefficient by 10 and then rounding the result to the nearest integer.
