# Supplementary material for: Hepatitis C risk score as a tool to identify individuals with HCV infection: a demonstration and cross-sectional epidemiological study in Egypt
Source: PubMed Central journal article supplement — BMJ Open. 2024 Jul 1;14(6):e085506. doi: 10.1136/bmjopen-2024-085506 (PMC11340217; doi:10.1136/bmjopen-2024-085506), 2024-07-01
Supplement: bmjopen-2024-085506.reviewer_comments.pdf [file bmjopen-2024-085506.reviewer_comments.pdf]

## PEER REVIEW HISTORY

BMJ Open publishes all reviews undertaken for accepted manuscripts. Reviewers are asked to complete a checklist review form (<http://bmjopen.bmj.com/site/about/resources/checklist.pdf>) and are provided with free text boxes to elaborate on their assessment. These free text comments are reproduced below.

## ARTICLE DETAILS

|                            |                                                                                                                                                 |
|----------------------------|-------------------------------------------------------------------------------------------------------------------------------------------------|
| <b>TITLE (PROVISIONAL)</b> | Hepatitis C Risk Score as a Tool to Identify Individuals with HCV Infection: A Demonstration and Cross-Sectional Epidemiological Study in Egypt |
| <b>AUTHORS</b>             | Abu-Raddad, Laith; El-Khoury, Rayane; Chemaitelly, Hiam; Alaama, Ahmed S.; Hermez, Joumana G.; Nagelkerke, Nico                                 |

This article was not externally reviewed at BMJ Open. Protocols that have been independently assessed prior to submission to BMJ Open are usually fast-tracked to publication on the grounds that further substantial changes will not be possible. This independent assessment will usually be external, independent review for both a substantial grant award from a non-commercial or government funder and ethics approval.
