# Supplementary material for: Hepatitis C risk score as a tool to identify individuals with HCV infection: a demonstration and cross-sectional epidemiological study in Egypt
Source: PubMed Central journal article supplement — BMJ Open. 2024 Jul 1;14(6):e085506. doi: 10.1136/bmjopen-2024-085506 (PMC11340217; doi:10.1136/bmjopen-2024-085506), 2024-07-01
Supplement: bmjopen-2024-085506supp001.pdf [file bmjopen-2024-085506supp001.pdf]

**Table S1** Characteristics of individuals tested for HCV antibodies in the EDHS 2008 and 2014

| Characteristics                   | EDHS 2008        |                                      |         | EDHS 2014        |                                      |         |
|-----------------------------------|------------------|--------------------------------------|---------|------------------|--------------------------------------|---------|
|                                   | Total tested (%) | HCV antibody positive (proportion %) | p-value | Total tested (%) | HCV antibody positive (proportion %) | p-value |
| <b>No</b>                         | 11,126           | 1,571                                |         | 26,047           | 1,456                                |         |
| <b>Sex</b>                        |                  |                                      |         |                  |                                      |         |
| Female                            | 6,052 (54.4)     | 711 (11.8)                           | <0.001  | 13,707 (52.6)    | 660 (4.8)                            | <0.001  |
| Male                              | 5,074 (45.6)     | 860 (17.0)                           |         | 12,340 (47.4)    | 796 (6.4)                            |         |
| <b>Age group (years)</b>          |                  |                                      |         |                  |                                      |         |
| 1-4                               | -                | -                                    | -       | 3,282 (12.6)     | 10 (0.3)                             |         |
| 5-9                               | -                | -                                    | -       | 3,601 (13.8)     | 10 (0.3)                             |         |
| 10-14                             | -                | -                                    | -       | 3,161 (12.1)     | 23 (0.7)                             |         |
| 15-19                             | 2,000 (18.0)     | 82 (4.1)                             | <0.001  | 2,568 (9.9)      | 30 (1.2)                             | <0.001  |
| 20-24                             | 1,837 (16.5)     | 91 (5.0)                             |         | 1,976 (7.6)      | 54 (2.7)                             |         |
| 25-29                             | 1,520 (13.7)     | 92 (6.1)                             |         | 2,358 (9.0)      | 88 (2.7)                             |         |
| 30-34                             | 1,244 (11.2)     | 133 (10.7)                           |         | 2,076 (8.0)      | 114 (5.5)                            |         |
| 35-39                             | 1,141 (10.3)     | 147 (12.9)                           |         | 1,853 (7.1)      | 130 (7.0)                            |         |
| 40-44                             | 1,069 (9.6)      | 238 (22.3)                           |         | 1,468 (5.6)      | 146 (10.0)                           |         |
| 45-49                             | 939 (8.4)        | 275 (29.3)                           |         | 1,380 (5.3)      | 208 (15.1)                           |         |
| 50-54                             | 728 (6.5)        | 272 (37.4)                           |         | 1,334 (5.1)      | 337 (25.3)                           |         |
| 55-59                             | 648 (5.8)        | 241 (37.2)                           |         | 990 (3.8)        | 306 (30.9)                           |         |
| <b>Type of place of residence</b> |                  |                                      |         |                  |                                      |         |
| Urban                             | 4,448 (40.0)     | 442 (9.9)                            | <0.001  | 11,955 (45.9)    | 546 (4.6)                            | <0.001  |
| Rural                             | 6,678 (60.0)     | 1,129 (16.9)                         |         | 14,092 (54.1)    | 910 (6.5)                            |         |

Abbreviations: EDHS, Egypt Demographic and Health Survey; HCV, Hepatitis C virus

**Table S2 STROBE checklist for cross-sectional studies**

|                           | <b>Item No</b> | <b>Recommendation</b>                                                                                                                                                                                                                                                                           | <b>Main Text Page No</b>                                                                                                                                                                                      |
|---------------------------|----------------|-------------------------------------------------------------------------------------------------------------------------------------------------------------------------------------------------------------------------------------------------------------------------------------------------|---------------------------------------------------------------------------------------------------------------------------------------------------------------------------------------------------------------|
| <b>Title and abstract</b> | 1              | (a) Indicate the study's design with a commonly used term in the title or the abstract                                                                                                                                                                                                          | Abstract <b>page 2</b>                                                                                                                                                                                        |
|                           |                | (b) Provide in the abstract an informative and balanced summary of what was done and what was found                                                                                                                                                                                             | Abstract <b>page 2</b>                                                                                                                                                                                        |
| <b>Introduction</b>       |                |                                                                                                                                                                                                                                                                                                 |                                                                                                                                                                                                               |
| Background/rationale      | 2              | Explain the scientific background and rationale for the investigation being reported                                                                                                                                                                                                            | Introduction <b>page 4</b>                                                                                                                                                                                    |
| Objectives                | 3              | State specific objectives, including any prespecified hypotheses                                                                                                                                                                                                                                | Introduction <b>page 5</b>                                                                                                                                                                                    |
| <b>Methods</b>            |                |                                                                                                                                                                                                                                                                                                 |                                                                                                                                                                                                               |
| Study design              | 4              | Present key elements of study design early in the paper                                                                                                                                                                                                                                         | Methods ('Egypt Demographic and Health Surveys', 'Risk score derivation' & 'Performance and validation of the risk score') <b>pages 5-8</b>                                                                   |
| Setting                   | 5              | Describe the setting, locations, and relevant dates, including periods of recruitment, exposure, follow-up, and data collection                                                                                                                                                                 | Methods ('Egypt Demographic and Health Surveys') <b>pages 5-6</b>                                                                                                                                             |
| Participants              | 6              | (a) Give the eligibility criteria, and the sources and methods of selection of participants                                                                                                                                                                                                     | Methods ('Egypt Demographic and Health Surveys') <b>pages 5-6</b>                                                                                                                                             |
| Variables                 | 7              | Clearly define all outcomes, exposures, predictors, potential confounders, and effect modifiers. Give diagnostic criteria, if applicable                                                                                                                                                        | Methods ('Egypt Demographic and Health Surveys', 'Risk score derivation' & 'Performance and validation of the risk score') <b>pages 5-8</b> & Table S1 <b>page 1</b>                                          |
| Data sources/measurement  | 8              | For each variable of interest, give sources of data and details of methods of assessment (measurement). Describe comparability of assessment methods if there is more than one group                                                                                                            | Methods ('Egypt Demographic and Health Surveys', 'Risk score derivation' & 'Performance and validation of the risk score') <b>pages 5-8</b> & Table 1 & Table 3 & Tables S2-S3 <b>pages 3-4</b> & Figures 1-2 |
| Bias                      | 9              | Describe any efforts to address potential sources of bias                                                                                                                                                                                                                                       | Methods ('Risk score derivation' & 'Performance and validation of the risk score') <b>pages 6-8</b> & Table 2 & Figures 1-2                                                                                   |
| Study size                | 10             | Explain how the study size was arrived at                                                                                                                                                                                                                                                       | Not applicable, see Methods ('Egypt Demographic and Health Surveys') <b>pages 5-6</b>                                                                                                                         |
| Quantitative variables    | 11             | Explain how quantitative variables were handled in the analyses. If applicable, describe which groupings were chosen and why                                                                                                                                                                    | Methods ('Egypt Demographic and Health Surveys', 'Risk score derivation' & 'Performance and validation of the risk score') <b>pages 5-8</b> & Tables 1-3 & Table S3                                           |
| Statistical methods       | 12             | (a) Describe all statistical methods, including those used to control for confounding                                                                                                                                                                                                           | Methods ('Risk score derivation' & 'Performance and validation of the risk score') <b>pages 5-8</b>                                                                                                           |
|                           |                | (b) Describe any methods used to examine subgroups and interactions                                                                                                                                                                                                                             | Not applicable, see Methods ('Risk score derivation' & 'Performance and validation of the risk score') <b>pages 6-8</b>                                                                                       |
|                           |                | (c) Explain how missing data were addressed                                                                                                                                                                                                                                                     | Not applicable, see Methods ('Egypt Demographic and Health Surveys', 'Risk score derivation') <b>pages 5-8</b>                                                                                                |
|                           |                | (d) If applicable, describe analytical methods taking account of sampling strategy                                                                                                                                                                                                              | Not applicable                                                                                                                                                                                                |
|                           |                | (e) Describe any sensitivity analyses                                                                                                                                                                                                                                                           | Not applicable                                                                                                                                                                                                |
| <b>Results</b>            |                |                                                                                                                                                                                                                                                                                                 |                                                                                                                                                                                                               |
| Participants              | 13             | (a) Report numbers of individuals at each stage of study—eg numbers potentially eligible, examined for eligibility, confirmed eligible, included in the study, completing follow-up, and analysed<br>(b) Give reasons for non-participation at each stage<br>(c) Consider use of a flow diagram | Table 1 & Tables S1 & Table S3                                                                                                                                                                                |
| Descriptive data          | 14             | (a) Give characteristics of study participants (eg demographic, clinical, social) and information on exposures and potential confounders                                                                                                                                                        | Table 1 & Table S1 & Table S3 & Figure S1                                                                                                                                                                     |
|                           |                | (b) Indicate number of participants with missing data for each variable of interest                                                                                                                                                                                                             | Not applicable, see Methods ('Egypt Demographic and Health Surveys') <b>pages 5-6</b>                                                                                                                         |
| Outcome data              | 15             | Report numbers of outcome events or summary measures                                                                                                                                                                                                                                            | Results <b>pages 8-11</b> , Figures 1-2, Figure S1, Tables 1-3 & Table S1                                                                                                                                     |
| Main results              | 16             | (a) Give unadjusted estimates and, if applicable,                                                                                                                                                                                                                                               | Table 1 & Table S3                                                                                                                                                                                            |

|                          |    |                                                                                                                                                                            |                                                |
|--------------------------|----|----------------------------------------------------------------------------------------------------------------------------------------------------------------------------|------------------------------------------------|
|                          |    | confounder-adjusted estimates and their precision (eg, 95% confidence interval). Make clear which confounders were adjusted for and why they were included                 |                                                |
|                          |    | (b) Report category boundaries when continuous variables were categorized                                                                                                  | Tables 1-3 & Table S1 & Table S3               |
|                          |    | © If relevant, consider translating estimates of relative risk into absolute risk for a meaningful time period                                                             | Tables 2-3 & Table S3 & Figure S1              |
| Other analyses           | 17 | Report other analyses done—eg analyses of subgroups and interactions, and sensitivity analyses                                                                             | Results <b>pages 8-11</b> & Table 2 & Figure 2 |
| <b>Discussion</b>        |    |                                                                                                                                                                            |                                                |
| Key results              | 18 | Summarise key results with reference to study objectives                                                                                                                   | Discussion <b>pages 11-12</b> , paragraphs 1-3 |
| Limitations              | 19 | Discuss limitations of the study, taking into account sources of potential bias or imprecision. Discuss both direction and magnitude of any potential bias                 | Discussion, paragraph 9 <b>page 14</b>         |
| Interpretation           | 20 | Give a cautious overall interpretation of results considering objectives, limitations, multiplicity of analyses, results from similar studies, and other relevant evidence | Discussion, paragraphs 4-6 <b>pages 12-13</b>  |
| Generalisability         | 21 | Discuss the generalisability (external validity) of the study results                                                                                                      | Discussion, paragraphs 7-8 <b>pages 13-14</b>  |
| <b>Other information</b> |    |                                                                                                                                                                            |                                                |
| Funding                  | 22 | Give the source of funding and the role of the funders for the present study and, if applicable, for the original study on which the present article is based              | Acknowledgements <b>page 16</b>                |

**Table S3** Results of univariable and multivariable regression analyses to derive the Egypt Hepatitis C Risk Score using data from EDHS 2008 and EDHS 2014

|                                   | EDHS 2008           |         |                     |         |      |              | EDHS 2014           |         |                     |         |      |              |
|-----------------------------------|---------------------|---------|---------------------|---------|------|--------------|---------------------|---------|---------------------|---------|------|--------------|
|                                   | OR* (95% CI)        | p-value | aOR† (95% CI)       | p-value | β‡   | Risk score § | OR* (95% CI)        | p-value | aOR† (95% CI)       | p-value | β‡   | Risk score § |
| <b>Sex</b>                        |                     |         |                     |         |      |              |                     |         |                     |         |      |              |
| Female                            | 1.00                |         | 1.00                |         | Ref  | 0            | 1.00                |         | 1.00                |         | Ref  | 0            |
| Male                              | 1.52 (1.35-1.70)    | <0.001  | 1.52 (1.34-1.73)    | <0.001  | 0.42 | 4            | 1.60 (1.41-1.83)    | <0.001  | 1.62 (1.40-1.87)    | <0.001  | 0.48 | 5            |
| <b>Age group (years)</b>          |                     |         |                     |         |      |              |                     |         |                     |         |      |              |
| 15-19                             | 1.00                |         | 1.00                |         |      | 0            | 1.00                |         | 1.00                |         |      |              |
| 20-24                             | 1.19 (0.86-1.64)    | 0.282   | 1.23 (0.89-1.69)    | 0.213   | 0.20 | 2            | 3.18 (1.82-5.58)    | <0.001  | 3.30 (1.88-5.81)    | <0.001  | 1.19 | 12           |
| 25-29                             | 1.52 (1.09-2.11)    | 0.014   | 1.60 (1.15-2.23)    | 0.005   | 0.47 | 5            | 4.38 (2.54-7.55)    | <0.001  | 4.50 (2.60-7.79)    | <0.001  | 1.51 | 15           |
| 30-34                             | 3.09 (2.27-4.21)    | <0.001  | 3.21 (2.35-4.39)    | <0.001  | 1.17 | 12           | 7.33 (4.29-12.49)   | <0.001  | 7.41 (4.35-12.65)   | <0.001  | 2.00 | 20           |
| 35-39                             | 3.69 (2.70-5.06)    | <0.001  | 3.89 (2.84-5.34)    | <0.001  | 1.36 | 14           | 8.56 (5.04-14.52)   | <0.001  | 8.74 (5.13-14.88)   | <0.001  | 2.17 | 22           |
| 40-44                             | 6.91 (5.15-9.26)    | <0.001  | 7.36 (5.47-9.90)    | <0.001  | 1.99 | 20           | 12.54 (7.51-20.95)  | <0.001  | 13.03 (7.79-21.81)  | <0.001  | 2.57 | 26           |
| 45-49                             | 9.30 (6.95-12.27)   | <0.001  | 10.34 (7.71-13.85)  | <0.001  | 2.34 | 23           | 18.64 (11.33-30.66) | <0.001  | 19.23 (11.66-31.69) | <0.001  | 2.96 | 30           |
| 50-54                             | 14.36 (10.78-19.13) | <0.001  | 16.43 (12.29-21.96) | <0.001  | 2.80 | 28           | 37.25 (22.75-60.98) | <0.001  | 41.11 (25.05-67.46) | <0.001  | 3.71 | 37           |
| 55-59                             | 15.09 (11.13-20.45) | <0.001  | 17.05 (12.50-23.26) | <0.001  | 2.84 | 28           | 49.26 (30.06-80.72) | <0.001  | 55.31 (33.59-91.06) | <0.001  | 4.01 | 40           |
| <b>Type of place of residence</b> |                     |         |                     |         |      |              |                     |         |                     |         |      |              |
| Urban                             | 1.00                |         | 1.00                |         | Ref  | 0            | 1.00                |         | 1.00                |         | Ref  | 0            |
| Rural                             | 1.91 (1.66-2.19)    | <0.001  | 2.34 (2.0-2.7)      | <0.001  | 0.85 | 9            | 1.73 (1.46-2.1)     | <0.001  | 2.15 (1.78-2.59)    | <0.001  | 0.76 | 8            |

Abbreviations: aOR, Adjusted odds ratio; CI, Confidence interval; EDHS, Egypt Demographic and Health Survey; HCV, Hepatitis C virus; OR, Odds ratio; Ref, Reference category.

\*The analysis applied the EDHS sampling weights.

†The odds ratio was adjusted for sex, age, and type of place of residence.

‡β-coefficients were based on the multivariable regression analysis.

§The risk score was calculated by multiplying the β coefficient by 10 and then rounding the result to the nearest integer.
